# Supplementary material for: All-carbon supramolecular complexation of a bilayer molecular nanographene with [60] and [70]fullerenes
Source: Royal Society of Chemistry journal article supplement (doi:10.1039/d4qo02071e), 2024-12-24
Supplement: d4qo02071e1.pdf [file d4qo02071e1.pdf]

## SUPPORTING INFORMATION

### All-carbon supramolecular complexation of a bilayer molecular nanographene with [60] and [70]fullerenes

Manuel Buendía,<sup>a</sup> Anton J. Stasyuk,<sup>b,c</sup> Salvatore Filippone,<sup>a</sup> Miquel Solà<sup>\*b</sup> and Nazario Martín<sup>\*a,d</sup>

<sup>a</sup> Departamento de Química Orgánica I, Facultad de Ciencias Químicas, Universidad Complutense de Madrid, Ciudad Universitaria s/n, 28040 Madrid, Spain. E-mail: nazmar@ucm.es

<sup>b</sup> Institut de Química Computacional i Catàlisi (IQCC) and Departament de Química, Universitat de Girona, M. Aurèlia Capmany, 69, 17003 Girona, Spain. E-mail: miquel.sola@udg.edu

<sup>c</sup> Departament de Farmàcia i Tecnologia Farmacèutica, i Físicoquímica, Facultat de Farmàcia i Ciències de l'Alimentació & Institut de Química Teòrica i Computacional (IQTCUB), Av. Joan XXIII 27-31, Universitat de Barcelona (UB), Barcelona, Spain.

<sup>d</sup> IMDEA-Nanociencia, C/ Faraday, 9, Campus de Cantoblanco, 28049 Madrid, Spain.

#### Table of Contents

|                                                             |    |
|-------------------------------------------------------------|----|
| 1. General .....                                            | 2  |
| 2. CNG-1 proton signal assignment .....                     | 3  |
| 3. Titrations monitored by <sup>1</sup> H NMR .....         | 6  |
| 3.1. CNG-1 and C <sub>60</sub> in PhCl-d <sup>5</sup> ..... | 6  |
| 3.2. CNG-1 and C <sub>70</sub> in PhCl-d <sup>5</sup> ..... | 8  |
| 4. Theoretical calculations .....                           | 10 |
| 5. References .....                                         | 24 |

## 1. General

Unless otherwise noted, all materials were obtained from commercial suppliers and used without further purification. C<sub>60</sub> 99.5 % and C<sub>70</sub> 99 % were purchased from Solenne, chlorobenzene-d<sup>5</sup> (PhCl-d<sup>5</sup>) 99 % atom % D was purchased from Aldrich, and **CNG-1** was prepared according to the procedure reported in the literature.<sup>1</sup> <sup>1</sup>H NMR spectra of the titration were recorded at 300 MHz (Bruker AVIII) at 298 K, and all NMR experiments for the assignment of **CNG-1** proton signals at 700MHz (Bruker AVIII) (<sup>1</sup>H NMR: 700 MHz; <sup>13</sup>C NMR: 176 MHz) at 300 K. Chemical shifts for <sup>1</sup>H NMR are expressed in parts per million (ppm) relative to the solvent. Data are reported as follows: chemical shift, multiplicity (s = singlet, bs = broad singlet, d = doublet), coupling constant (Hz), and integration.

---

<sup>1</sup> **1.** Buendía, M.; Fernández-García, J. M.; Perles, J.; Filippone, S.; Martín, N. Enantioselective synthesis of a two-fold inherently chiral molecular nanographene. *Nat. Synth.* **2024**, *3* (4), 545-553. DOI: 10.1038/s44160-024-00484-x.

## 2. Assignment of CNG-1 proton signals

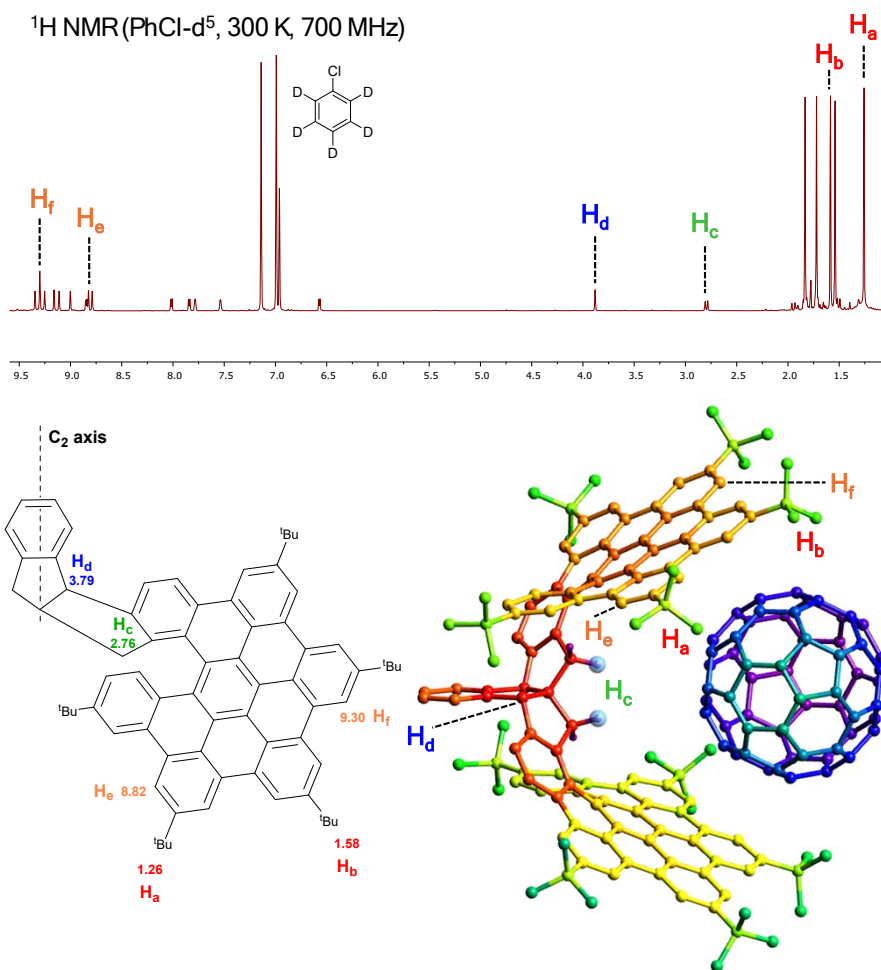

**Figure S1.** Assignment of CNG-1 proton signals  $H_a$ - $H_f$  in  $^1\text{H NMR}$  spectra (top; PhCl- $d^5$ , 300 K, 700 MHz); in half of the molecule (bottom left; chemical shifts in ppm); and in the CNG-1- $\text{C}_{60}$  complex representation (bottom right).

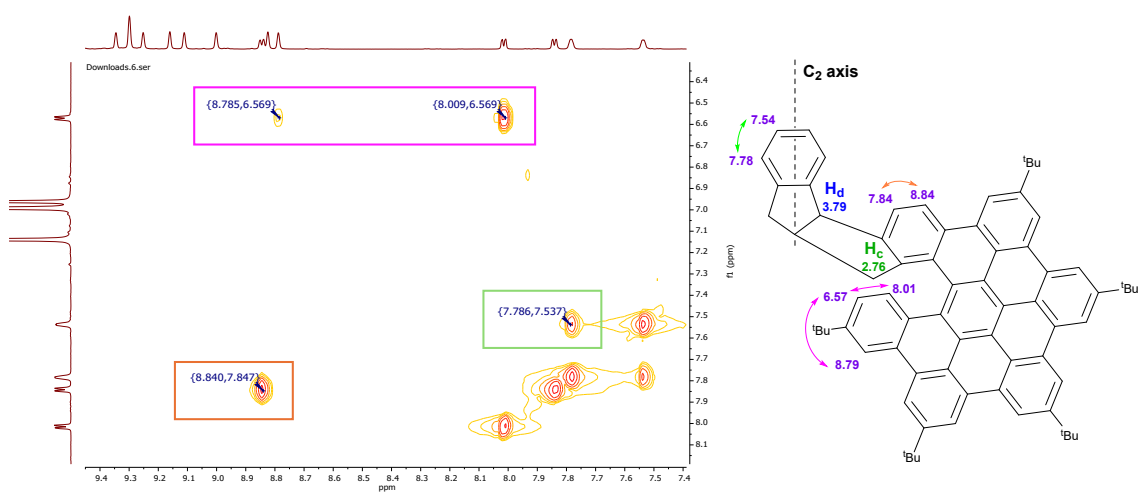

**Figure S2.** Expansion of COSY experiment of CNG-1 showing proton-proton correlations between aromatic proton signals (PhCl- $d^5$ , 300 K, 700 MHz).

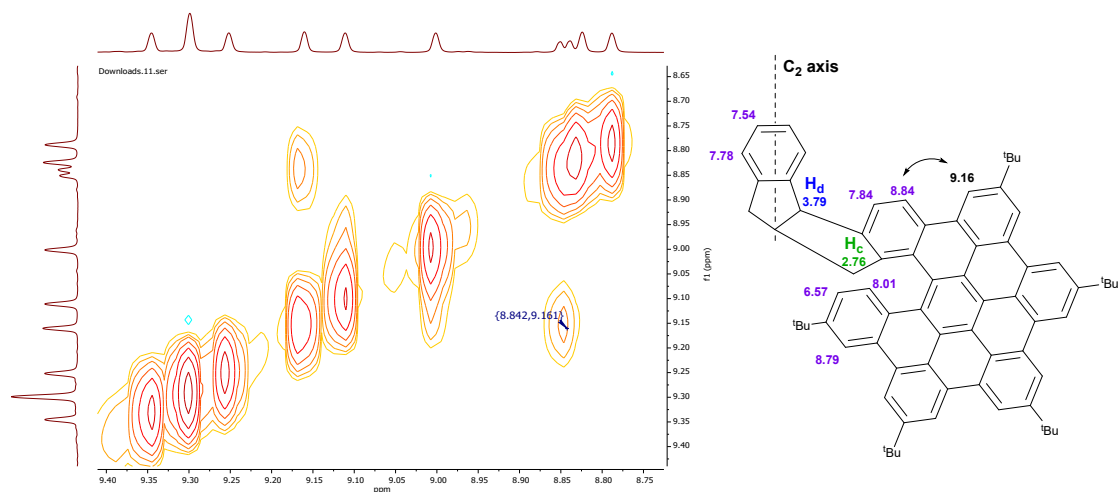

**Figure S3.** Expansion of 2D NOESY experiment of **CNG-1** showing a short distance proton-proton dipolar interaction between protons at the edge of the nanographene layer (PhCl-d<sup>5</sup>, 300 K, 700 MHz).

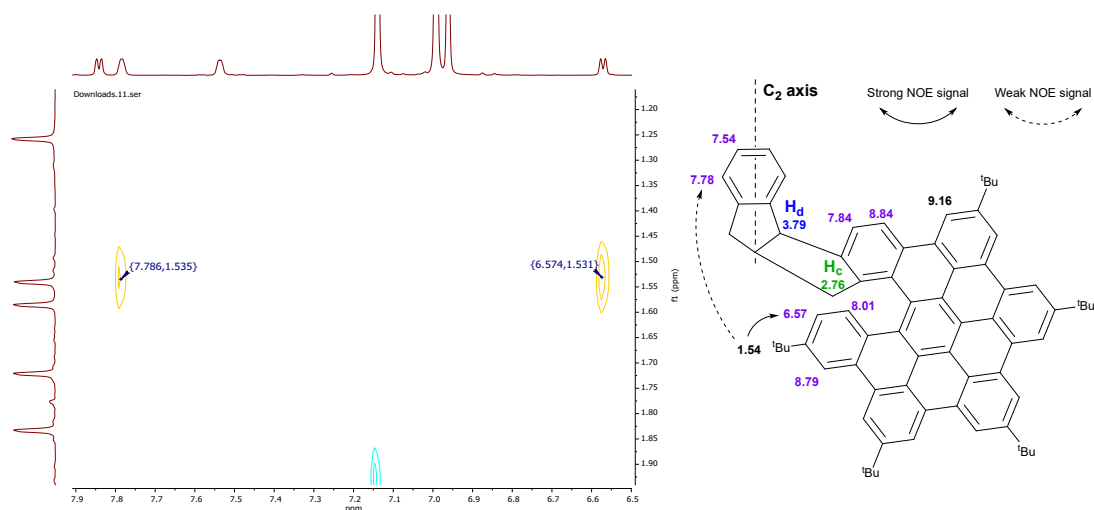

**Figure S4.** Expansion of 2D NOESY experiment of **CNG-1** showing proton-proton short distance and long distance dipolar interactions between *tert*-butyl proton at 1.54 ppm and its neighboring protons (PhCl-d<sup>5</sup>, 300 K, 700 MHz).

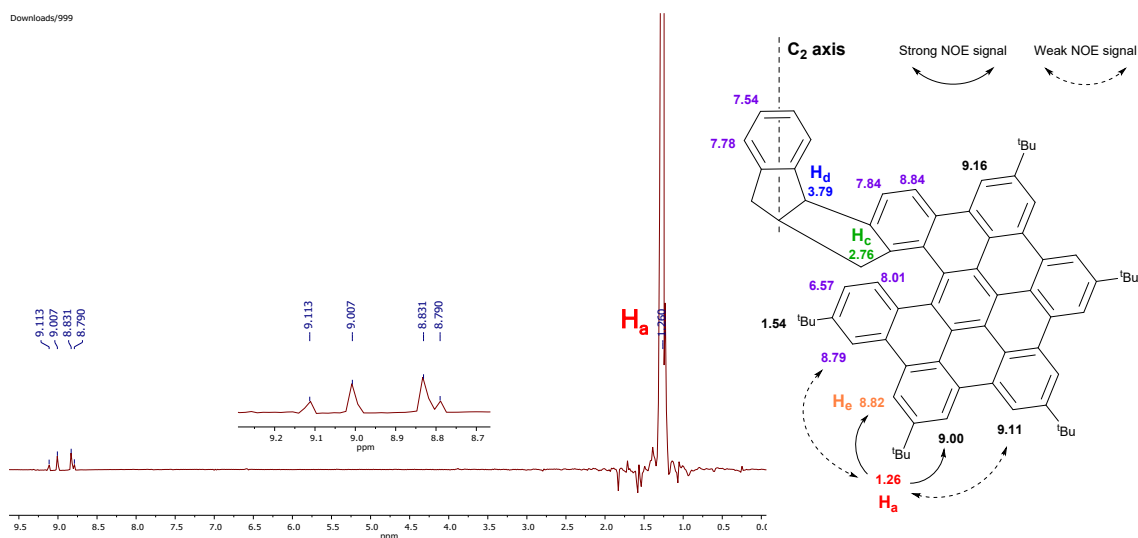

**Figure S5.** 1D NOESY experiment of **CNG-1** and its expansion, showing proton-proton short distance and long distance dipolar interactions between *tert*-butyl proton at 1.26 ppm and its neighboring protons at the edge of the nanographene (PhCl-d<sup>5</sup>, 300 K, 700 MHz).

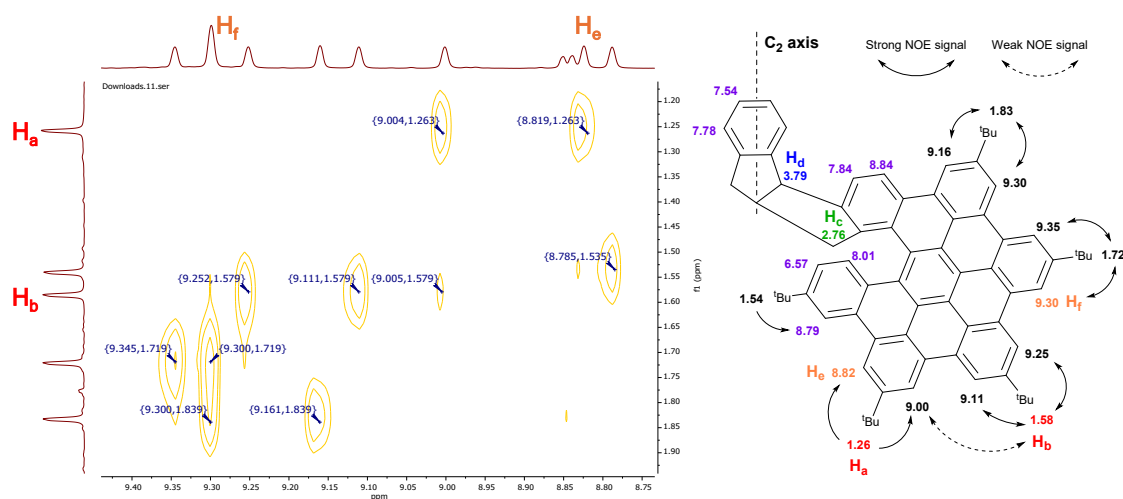

**Figure S6.** Expansion of 2D NOESY experiment of **CNG-1** showing proton-proton short distance and long distance dipolar interactions between all five anisochronous *tert*-butyl protons and their neighboring protons at the edge of the nanographene (PhCl-d<sup>5</sup>, 300 K, 700 MHz).

### 3. Titrations monitored by $^1\text{H}$ NMR

#### 3.1. CNG-1 and $\text{C}_{60}$ in $\text{PhCl-d}^5$

Table S1. Experimental data of the  $^1\text{H}$  NMR titration between host CNG-1 and guest  $\text{C}_{60}$ .

| Stock solutions in $\text{PhCl-d}^5$ |             |                                       |           |              |          | Initial CNG-1 n (mol)                 |          | Initial Volume (mL) |     |
|--------------------------------------|-------------|---------------------------------------|-----------|--------------|----------|---------------------------------------|----------|---------------------|-----|
| Composition                          | Volume (mL) | Mw ( $\text{g}\cdot\text{mol}^{-1}$ ) | Mass (mg) | Molarity (M) | n (mol)  | CNG-1 Molarity (M)                    | 5,00E-07 | 5,00E-04            | 0,5 |
| CNG-1                                | 2,5         | 1748,49                               | 2,19      | 5,00E-04     | 1,25E-06 |                                       |          |                     |     |
| $\text{C}_{60}$ +CNG-1 (5,00E-04 M)  | 2           | 720,64                                | 13,69     | 9,50E-03     | 1,90E-05 |                                       |          |                     |     |
|                                      |             |                                       |           |              |          | $\text{C}_{60}$ Solution Molarity (M) |          | 9,50E-03            |     |

  

|                                       | Aliquot (mL) | Volume of $\text{C}_{60}$ +CNG-1 added (mL) | Total CNG-1                          |          |                                     | Total $\text{C}_{60}$              |          |                                               | Total volume (mL) | $\delta_c$ (ppm) |
|---------------------------------------|--------------|---------------------------------------------|--------------------------------------|----------|-------------------------------------|------------------------------------|----------|-----------------------------------------------|-------------------|------------------|
|                                       |              |                                             | Equivalents related to Initial CNG-1 | n (mol)  | CNG-1 Molarity [ $\text{H}_0$ ] (M) | Equivalents related to Total CNG-1 | n (mol)  | $\text{C}_{60}$ Molarity [ $\text{G}_0$ ] (M) |                   |                  |
| CNG-1 stock solution                  | 0,000        | 0,000                                       | 1,00                                 | 2,50E-07 | 5,00E-04                            | 0,00                               | 0,00E+00 | 0,00E+00                                      | 0,500             | 2,761            |
| Addition 1                            | 0,010        | 0,010                                       | 1,02                                 | 2,55E-07 | 5,00E-04                            | 0,37                               | 9,50E-08 | 1,86E-04                                      | 0,510             | 2,765            |
| Addition 2                            | 0,010        | 0,020                                       | 1,04                                 | 2,60E-07 | 5,00E-04                            | 0,73                               | 1,90E-07 | 3,65E-04                                      | 0,520             | 2,765            |
| Addition 3                            | 0,010        | 0,030                                       | 1,06                                 | 2,65E-07 | 5,00E-04                            | 1,08                               | 2,85E-07 | 5,38E-04                                      | 0,530             | 2,768            |
| Addition 4                            | 0,015        | 0,045                                       | 1,09                                 | 2,73E-07 | 5,00E-04                            | 1,57                               | 4,28E-07 | 7,84E-04                                      | 0,545             | 2,771            |
| Addition 5                            | 0,015        | 0,060                                       | 1,12                                 | 2,80E-07 | 5,00E-04                            | 2,04                               | 5,70E-07 | 1,02E-03                                      | 0,560             | 2,774            |
| Addition 6                            | 0,020        | 0,080                                       | 1,16                                 | 2,90E-07 | 5,00E-04                            | 2,62                               | 7,60E-07 | 1,31E-03                                      | 0,580             | 2,779            |
| Addition 7                            | 0,020        | 0,100                                       | 1,20                                 | 3,00E-07 | 5,00E-04                            | 3,17                               | 9,50E-07 | 1,58E-03                                      | 0,600             | 2,782            |
| Addition 8                            | 0,025        | 0,125                                       | 1,25                                 | 3,13E-07 | 5,00E-04                            | 3,80                               | 1,19E-06 | 1,90E-03                                      | 0,625             | 2,785            |
| Addition 9                            | 0,030        | 0,155                                       | 1,31                                 | 3,28E-07 | 5,00E-04                            | 4,50                               | 1,47E-06 | 2,25E-03                                      | 0,655             | 2,789            |
| Addition 10                           | 0,035        | 0,190                                       | 1,38                                 | 3,45E-07 | 5,00E-04                            | 5,23                               | 1,81E-06 | 2,62E-03                                      | 0,690             | 2,792            |
| Addition 11                           | 0,035        | 0,225                                       | 1,45                                 | 3,63E-07 | 5,00E-04                            | 5,90                               | 2,14E-06 | 2,95E-03                                      | 0,725             | 2,796            |
| Addition 12                           | 0,045        | 0,270                                       | 1,54                                 | 3,85E-07 | 5,00E-04                            | 6,66                               | 2,57E-06 | 3,33E-03                                      | 0,770             | 2,800            |
| Addition 13                           | 0,050        | 0,320                                       | 1,64                                 | 4,10E-07 | 5,00E-04                            | 7,41                               | 3,04E-06 | 3,71E-03                                      | 0,820             | 2,804            |
| Addition 14                           | 0,060        | 0,380                                       | 1,76                                 | 4,40E-07 | 5,00E-04                            | 8,20                               | 3,61E-06 | 4,10E-03                                      | 0,880             | 2,809            |
| Addition 15                           | 0,070        | 0,450                                       | 1,90                                 | 4,75E-07 | 5,00E-04                            | 9,00                               | 4,28E-06 | 4,50E-03                                      | 0,950             | 2,813            |
| Addition 16                           | 0,075        | 0,525                                       | 2,05                                 | 5,13E-07 | 5,00E-04                            | 9,73                               | 4,99E-06 | 4,87E-03                                      | 1,025             | 2,816            |
| Addition 17                           | 0,090        | 0,615                                       | 2,23                                 | 5,58E-07 | 5,00E-04                            | 10,48                              | 5,84E-06 | 5,24E-03                                      | 1,115             | 2,819            |
| Addition 18                           | 0,105        | 0,720                                       | 2,44                                 | 6,10E-07 | 5,00E-04                            | 11,21                              | 6,84E-06 | 5,61E-03                                      | 1,220             | 2,823            |
| Addition 19                           | 0,120        | 0,840                                       | 2,68                                 | 6,70E-07 | 5,00E-04                            | 11,91                              | 7,98E-06 | 5,96E-03                                      | 1,340             | 2,824            |
| Addition 20                           | 0,140        | 0,980                                       | 2,96                                 | 7,40E-07 | 5,00E-04                            | 12,58                              | 9,31E-06 | 6,29E-03                                      | 1,480             | 2,826            |
| Addition 21                           | 0,160        | 1,140                                       | 3,28                                 | 8,20E-07 | 5,00E-04                            | 13,21                              | 1,08E-05 | 6,60E-03                                      | 1,640             | 2,829            |
| Addition 22                           | 0,160        | 1,300                                       | 3,60                                 | 9,00E-07 | 5,00E-04                            | 13,72                              | 1,24E-05 | 6,86E-03                                      | 1,800             | 2,830            |
| Addition 23                           | 0,200        | 1,500                                       | 4,00                                 | 1,00E-06 | 5,00E-04                            | 14,25                              | 1,43E-05 | 7,13E-03                                      | 2,000             | 2,833            |
| $\text{C}_{60}$ +CNG-1 stock solution | -            | -                                           | 4,00                                 | 1,00E-06 | 5,00E-04                            | 19,00                              | 4,75E-06 | 9,50E-03                                      | 0,500             | 2,848            |

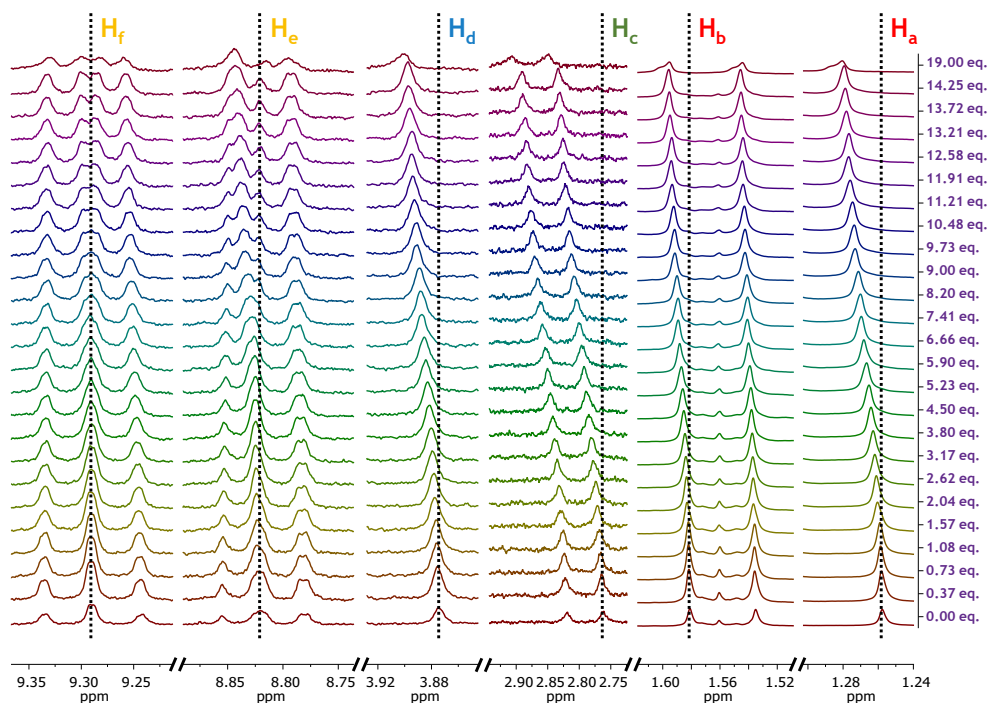

Figure S7. Partial  $^1\text{H}$  NMR spectra of the titration between host CNG-1 and guest  $\text{C}_{60}$ , showcasing six signals ( $\text{H}_a$  to  $\text{H}_f$ , see manuscript for the definition) with the greatest chemical shifts ( $\text{PhCl-d}^5$ , 298 K, 300 MHz).

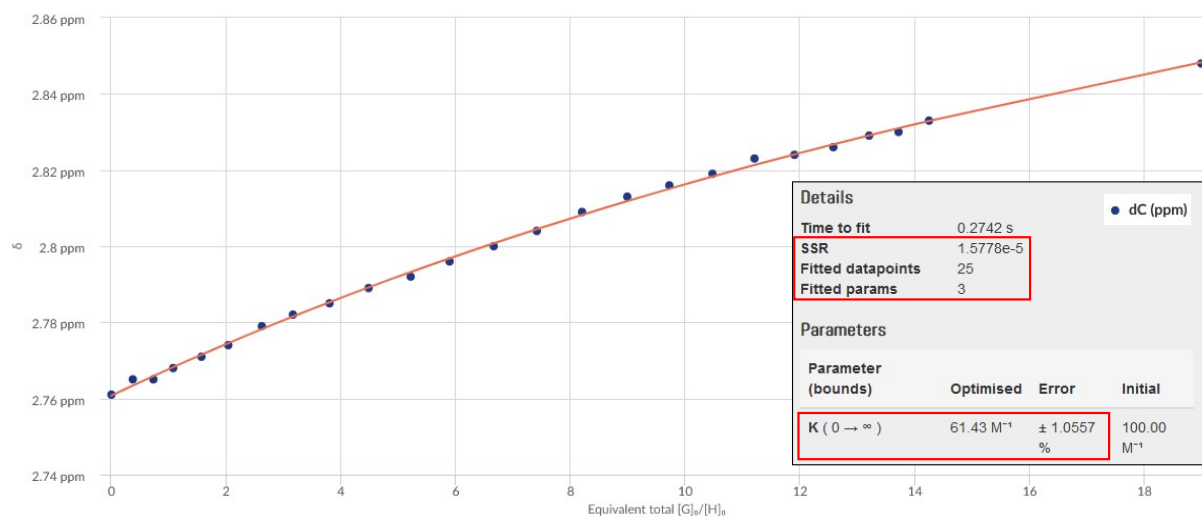

**Figure S8.** Dataset points of the titration between host **CNG-1** and guest **C<sub>60</sub>**, representing chemical shifts of signal H<sub>c</sub> ( $\delta_c$ ) vs equivalents of guest ( $[G]_0/[H]_0$ ), and non-linear fitting model adjusted for a 1:1 stoichiometry.

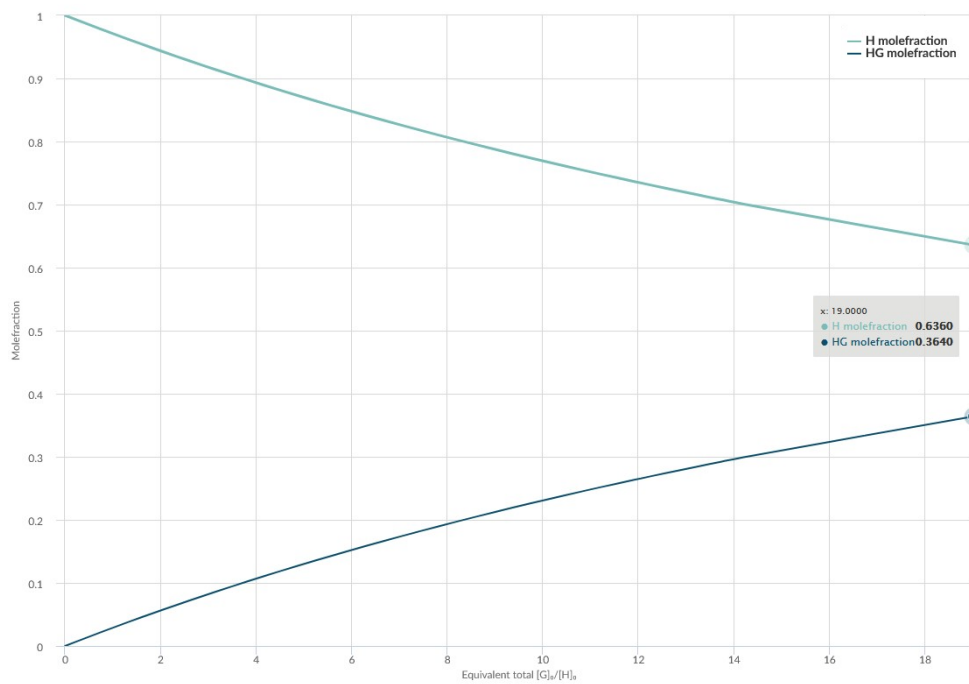

**Figure S9.** Molar fractions of free **CNG-1** host (H) and supramolecular complex **CNG-1⊃C<sub>60</sub>** (HG) at each point of the titration.

### 3.2. CNG-1 and C<sub>70</sub> in PhCl-d<sup>5</sup>

Table S2. Experimental data of the <sup>1</sup>H NMR titration between host CNG-1 and guest C<sub>70</sub>.

| Stock solutions in PhCl-d <sup>5</sup> |             |                           |           |              |          | Initial CNG-1 n (mol)                 |          |
|----------------------------------------|-------------|---------------------------|-----------|--------------|----------|---------------------------------------|----------|
| Composition                            | Volume (mL) | Mw (g·mol <sup>-1</sup> ) | Mass (mg) | Molarity (M) | n (mol)  | CNG-1 Molarity (M)                    | 2,50E-07 |
| CNG-1                                  | 2,5         | 1748,49                   | 2,19      | 5,00E-04     | 1,25E-06 | CNG-1 Molarity (M)                    | 5,00E-04 |
| C <sub>70</sub> +CNG-1 (5,00E-04 M)    | 2           | 840,75                    | 6,73      | 4,00E-03     | 8,00E-06 | Initial Volume (mL)                   | 0,5      |
|                                        |             |                           |           |              |          | C <sub>70</sub> Solution Molarity (M) | 4,00E-03 |

  

|                                       | Aliquot (mL) | Volume of C <sub>70</sub> +CNG-1 added (mL) | Total CNG-1                          |          |                                     | Total C <sub>70</sub>              |          |                                               | Total volume (mL) | H <sub>c</sub> δ <sub>c</sub> (ppm) |
|---------------------------------------|--------------|---------------------------------------------|--------------------------------------|----------|-------------------------------------|------------------------------------|----------|-----------------------------------------------|-------------------|-------------------------------------|
|                                       |              |                                             | Equivalents related to Initial CNG-1 | n (mol)  | CNG-1 Molarity [H] <sub>0</sub> (M) | Equivalents related to Total CNG-1 | n (mol)  | C <sub>70</sub> Molarity [G] <sub>0</sub> (M) |                   |                                     |
| CNG-1 stock solution                  | 0,000        | 0,000                                       | 1,00                                 | 2,50E-07 | 5,00E-04                            | 0,00                               | 0,00E+00 | 0,00E+00                                      | 0,500             | 2,763                               |
| Addition 1                            | 0,010        | 0,010                                       | 1,02                                 | 2,55E-07 | 5,00E-04                            | 0,16                               | 4,00E-08 | 7,84E-05                                      | 0,510             | 2,764                               |
| Addition 2                            | 0,010        | 0,020                                       | 1,04                                 | 2,60E-07 | 5,00E-04                            | 0,31                               | 8,00E-08 | 1,54E-04                                      | 0,520             | 2,767                               |
| Addition 3                            | 0,010        | 0,030                                       | 1,06                                 | 2,65E-07 | 5,00E-04                            | 0,45                               | 1,20E-07 | 2,26E-04                                      | 0,530             | 2,769                               |
| Addition 4                            | 0,015        | 0,045                                       | 1,09                                 | 2,73E-07 | 5,00E-04                            | 0,66                               | 1,80E-07 | 3,30E-04                                      | 0,545             | 2,771                               |
| Addition 5                            | 0,015        | 0,060                                       | 1,12                                 | 2,80E-07 | 5,00E-04                            | 0,86                               | 2,40E-07 | 4,29E-04                                      | 0,560             | 2,772                               |
| Addition 6                            | 0,020        | 0,080                                       | 1,16                                 | 2,90E-07 | 5,00E-04                            | 1,10                               | 3,20E-07 | 5,52E-04                                      | 0,580             | 2,777                               |
| Addition 7                            | 0,020        | 0,100                                       | 1,20                                 | 3,00E-07 | 5,00E-04                            | 1,33                               | 4,00E-07 | 6,67E-04                                      | 0,600             | 2,778                               |
| Addition 8                            | 0,025        | 0,125                                       | 1,25                                 | 3,13E-07 | 5,00E-04                            | 1,60                               | 5,00E-07 | 8,00E-04                                      | 0,625             | 2,782                               |
| Addition 9                            | 0,030        | 0,155                                       | 1,31                                 | 3,28E-07 | 5,00E-04                            | 1,89                               | 6,20E-07 | 9,47E-04                                      | 0,655             | 2,784                               |
| Addition 10                           | 0,035        | 0,190                                       | 1,38                                 | 3,45E-07 | 5,00E-04                            | 2,20                               | 7,60E-07 | 1,10E-03                                      | 0,690             | 2,786                               |
| Addition 11                           | 0,035        | 0,225                                       | 1,45                                 | 3,63E-07 | 5,00E-04                            | 2,48                               | 9,00E-07 | 1,24E-03                                      | 0,725             | 2,790                               |
| Addition 12                           | 0,045        | 0,270                                       | 1,54                                 | 3,85E-07 | 5,00E-04                            | 2,81                               | 1,08E-06 | 1,40E-03                                      | 0,770             | 2,793                               |
| Addition 13                           | 0,050        | 0,320                                       | 1,64                                 | 4,10E-07 | 5,00E-04                            | 3,12                               | 1,28E-06 | 1,56E-03                                      | 0,820             | 2,794                               |
| Addition 14                           | 0,060        | 0,380                                       | 1,76                                 | 4,40E-07 | 5,00E-04                            | 3,45                               | 1,52E-06 | 1,73E-03                                      | 0,880             | 2,799                               |
| Addition 15                           | 0,070        | 0,450                                       | 1,90                                 | 4,75E-07 | 5,00E-04                            | 3,79                               | 1,80E-06 | 1,89E-03                                      | 0,950             | 2,801                               |
| Addition 16                           | 0,075        | 0,525                                       | 2,05                                 | 5,13E-07 | 5,00E-04                            | 4,10                               | 2,10E-06 | 2,05E-03                                      | 1,025             | 2,802                               |
| Addition 17                           | 0,090        | 0,615                                       | 2,23                                 | 5,58E-07 | 5,00E-04                            | 4,41                               | 2,46E-06 | 2,21E-03                                      | 1,115             | 2,805                               |
| Addition 18                           | 0,105        | 0,720                                       | 2,44                                 | 6,10E-07 | 5,00E-04                            | 4,72                               | 2,88E-06 | 2,36E-03                                      | 1,220             | 2,805                               |
| Addition 19                           | 0,120        | 0,840                                       | 2,68                                 | 6,70E-07 | 5,00E-04                            | 5,01                               | 3,36E-06 | 2,51E-03                                      | 1,340             | 2,809                               |
| Addition 20                           | 0,140        | 0,980                                       | 2,96                                 | 7,40E-07 | 5,00E-04                            | 5,30                               | 3,92E-06 | 2,65E-03                                      | 1,480             | 2,809                               |
| Addition 21                           | 0,160        | 1,140                                       | 3,28                                 | 8,20E-07 | 5,00E-04                            | 5,56                               | 4,56E-06 | 2,78E-03                                      | 1,640             | 2,808                               |
| Addition 22                           | 0,160        | 1,300                                       | 3,60                                 | 9,00E-07 | 5,00E-04                            | 5,78                               | 5,20E-06 | 2,89E-03                                      | 1,800             | 2,809                               |
| Addition 23                           | 0,200        | 1,500                                       | 4,00                                 | 1,00E-06 | 5,00E-04                            | 6,00                               | 6,00E-06 | 3,00E-03                                      | 2,000             | 2,810                               |
| C <sub>70</sub> +CNG-1 stock solution | -            | -                                           | 4,00                                 | 1,00E-06 | 5,00E-04                            | 8,00                               | 2,00E-06 | 4,00E-03                                      | 0,500             | 2,812                               |

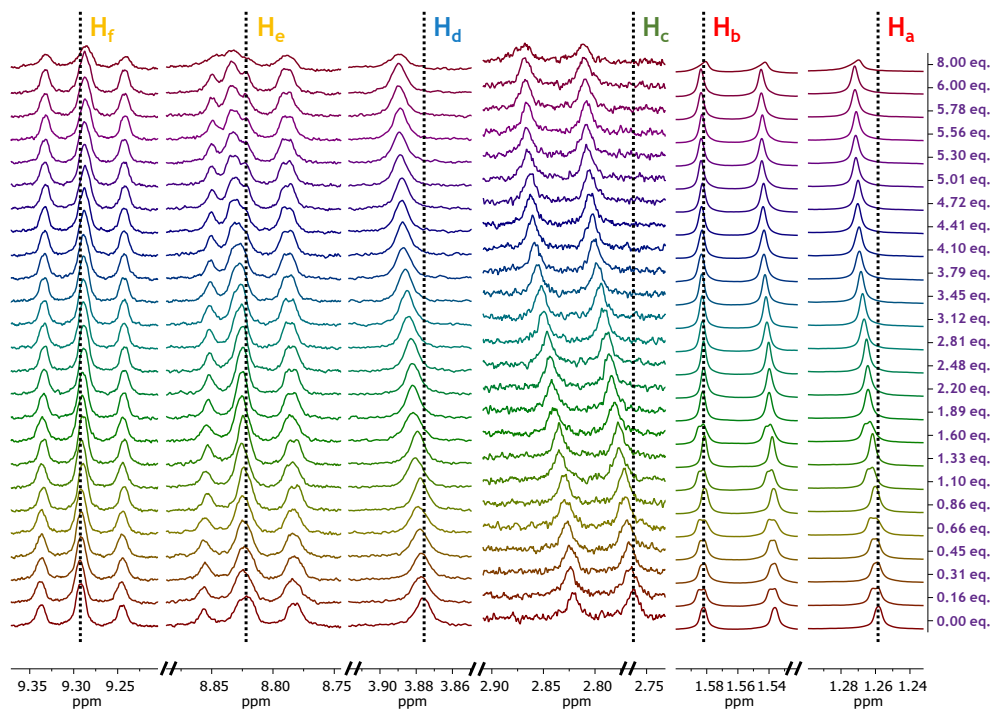

Figure S10. Partial <sup>1</sup>H NMR spectra of the titration between host CNG-1 and guest C<sub>70</sub>, showcasing six signals (H<sub>a</sub> to H<sub>f</sub>, see manuscript for the definition) with the greatest chemical shifts (PhCl-d<sup>5</sup>, 298 K, 300 MHz).



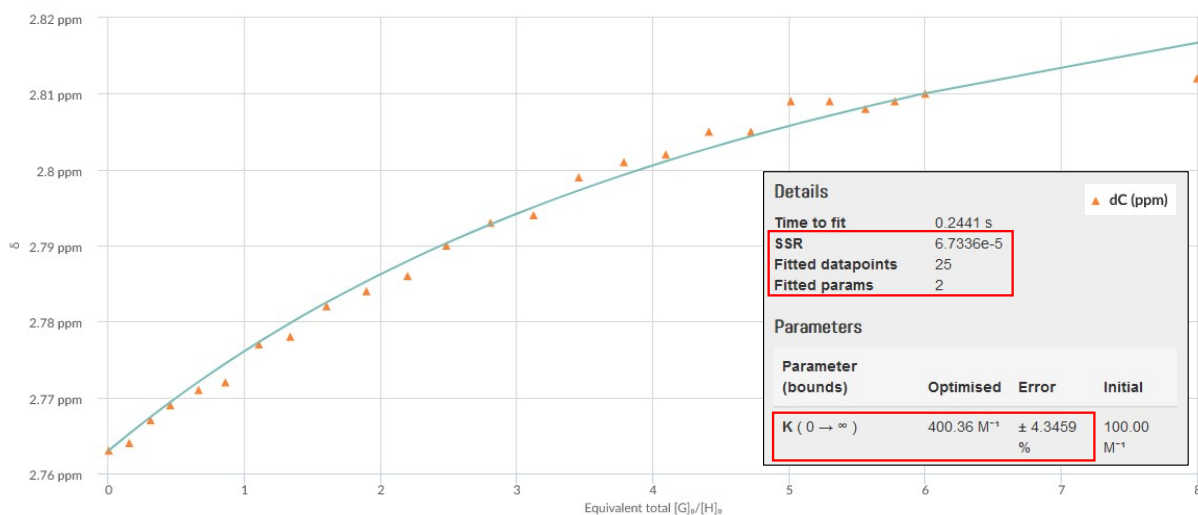

**Figure S11.** Dataset points of the titration between host **CNG-1** and guest  $C_{70}$ , representing chemical shifts of signal  $H_c$  ( $\delta_c$ ) vs equivalents of guest ( $[G]_0/[H]_0$ ), and non-linear fitting model adjusted for a 1:1 stoichiometry.

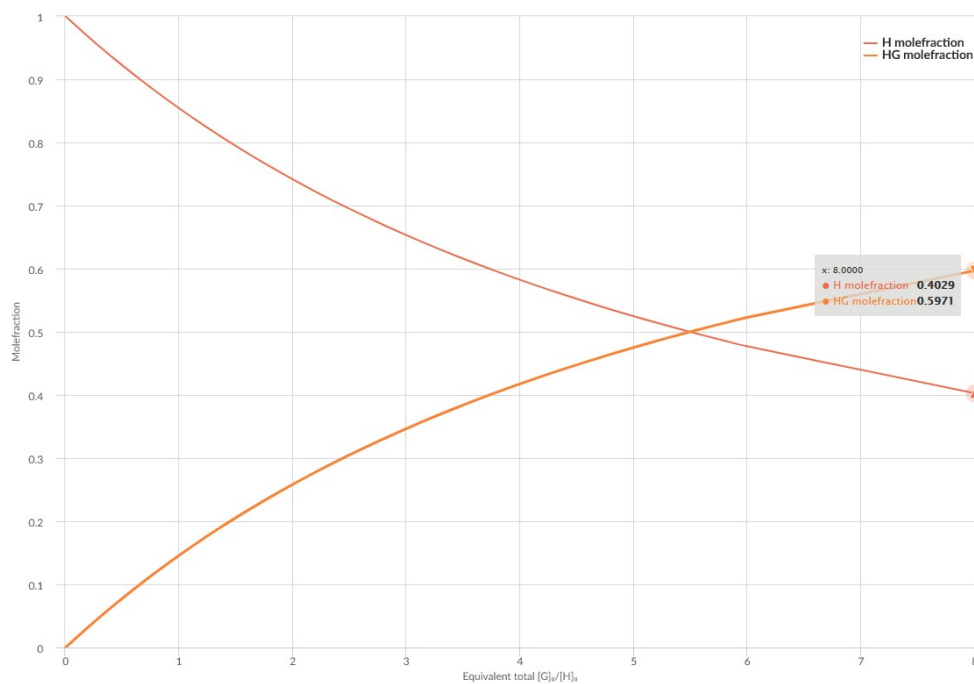

**Figure S12.** Molar fractions of free **CNG-1** host (H) and supramolecular complex **CNG-1**→ $C_{70}$  (HG) at each point of the titration.

## 4. Theoretical calculations

### Quantum-chemical calculations

Geometry optimization of the complexes was performed employing the DFT BLYP<sup>1,2</sup> exchange–correlation functional with Ahlrichs' def2-SVP basis set.<sup>3,4</sup> The empirical dispersion D3 correction was computed with the Becke–Johnson damping function.<sup>5,6</sup> Interaction energy was computed using the BLYP functional coupled with TZVP basis<sup>7</sup> for the BLYP-D3(BJ)/def2-SVP optimized geometries. Its decomposition analysis (EDA)<sup>8,9</sup> was performed using the Amsterdam Density Functional (ADF) program.<sup>10</sup> Molecular structures and frontier molecular orbitals were visualized by Chemcraft 1.8. program.<sup>11</sup>

### Energy decomposition analysis

The interaction energy between the **CNG-1** and the fullerene in the gas phase was examined in the framework of the Kohn-Sham MO model using a quantitative energy decomposition into electrostatic interactions, Pauli repulsive orbital interactions and attractive orbital interactions, to which a term  $\Delta E_{\text{disp}}$  was added to account for the dispersion correction:<sup>12-14</sup>

$$\Delta E_{\text{int}} = \Delta E_{\text{elstat}} + \Delta E_{\text{Pauli}} + \Delta E_{\text{oi}} + \Delta E_{\text{disp}} \quad (1)$$

The term  $\Delta V_{\text{elstat}}$  corresponds to the classical electrostatic interactions between the unperturbed charge distributions of the prepared (i.e. deformed) fragments and is usually attractive. The Pauli repulsion,  $\Delta E_{\text{Pauli}}$ , comprises the destabilizing interactions between occupied orbitals and is responsible for any steric repulsion. The orbital interactions,  $\Delta E_{\text{oi}}$ , account for electron-pair bonding, charge transfer (i.e., donor–acceptor interactions between occupied orbitals on one moiety and unoccupied orbitals on the other, including HOMO-LUMO interactions) and polarization (empty-occupied orbital mixing on one fragment due to the presence of another fragment). The term  $\Delta E_{\text{disp}}$  accounts for the dispersion corrections.<sup>15,16</sup>

### Non-covalent interaction (NCI) index

The NCI method<sup>17-19</sup> relies on two scalar fields to map local bonding properties: the electron density ( $\rho$ ) and the reduced-density gradient (RDG,  $s$ ) defined as:

$$s = \frac{1}{2(3\pi)^{1/3}} \frac{|\nabla\rho|}{\rho^{4/3}} \quad (2)$$

The combination of  $s$  and  $\rho$  allows a rough partition of real space into bonding regions: high- $s$  low- $\rho$  corresponds to non-interacting density tails, low- $s$  high- $\rho$  to covalent bonds, and low- $s$  low- $\rho$  to non-covalent interactions. The NCI analysis was carried out at the BLYP-D3(BJ)/def2-SVP level using Multiwfn program.<sup>20</sup>

### Complexation, interaction and deformation energies

The interaction energies were calculated directly from the electronic energy of complex and electronic energies of its subsystems. For **Host**⊃**C<sub>xxx</sub>**, the interaction energy can be expressed as follows:

$$E_{\text{int}} = E_{\text{Host} \supset C_{xxx}} - (E_{\text{Host}} + E_{C_{xxx}}) \quad (3)$$

Deformation (or strain) energy for each of studied complexes has been determined using following equation:

$$E_{Strain} = (E_{Host}^{Complex\ geom.} - E_{Host}^{Eq.\ geom.}) + (E_{C_{XXX}}^{Complex\ geom.} - E_{C_{XXX}}^{Eq.\ geom.}) \quad (4)$$

At the same time, complexation energy comprises both interaction ( $\Delta E_{int.}$ ) and deformation ( $E_{def.}$ ) energies. Thus  $\Delta E_{Complex.}$  can be represented as following:

$$E_{Complex} = E_{int} + E_{def} \quad (5)$$

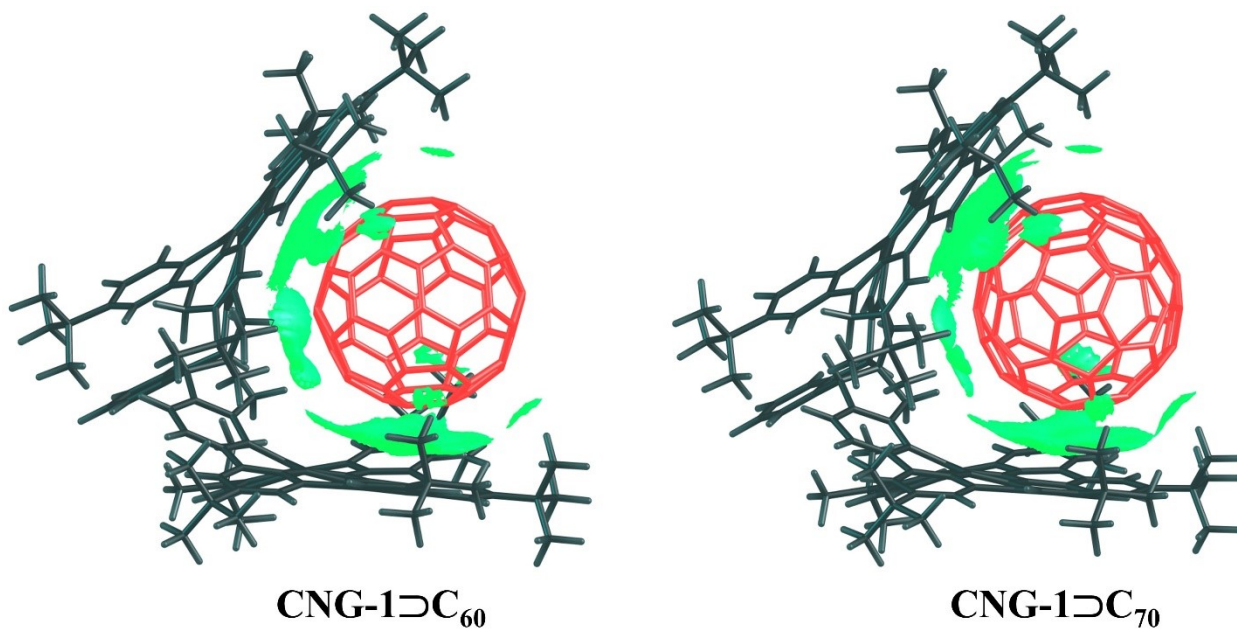

**Figure S13.** NCI isosurfaces for **CNG-1⊃C<sub>60</sub>** and **CNG-1⊃C<sub>70</sub>** complexes.

## Cartesian coordinates

### CNG-1 nanographene tweezers

Gas-phase. BLYP-D3(BJ)/def2-SVP

| Atom | X            | Y            | Z            |
|------|--------------|--------------|--------------|
| 6    | -0.849728000 | 2.528368000  | 2.078255000  |
| 6    | -0.156166000 | 3.208995000  | 3.098329000  |
| 6    | -0.129842000 | 2.637325000  | 0.741091000  |
| 6    | 1.145490000  | 3.538045000  | 1.019404000  |
| 6    | 1.103297000  | 3.881043000  | 2.568017000  |
| 6    | 2.496331000  | 2.788639000  | 0.794226000  |
| 6    | 0.982713000  | 4.787925000  | 0.096843000  |
| 6    | 3.108393000  | 2.581580000  | 2.169727000  |
| 6    | -0.361715000 | 4.643728000  | -0.596878000 |
| 6    | 4.340024000  | 1.941402000  | 2.510492000  |
| 6    | 4.921902000  | 2.236036000  | 3.791076000  |
| 6    | 4.159315000  | 2.964470000  | 4.746048000  |
| 6    | 2.890456000  | 3.460912000  | 4.442047000  |
| 6    | 2.388638000  | 3.302775000  | 3.133430000  |
| 6    | -0.916838000 | 3.385753000  | -0.319445000 |
| 6    | -2.052837000 | 2.925219000  | -1.016679000 |
| 6    | -2.575009000 | 3.703356000  | -2.050681000 |
| 6    | -2.032058000 | 4.979484000  | -2.368974000 |
| 6    | -0.968954000 | 5.510766000  | -1.558667000 |
| 6    | -0.641755000 | 3.191827000  | 4.417360000  |
| 6    | -1.844601000 | 2.517927000  | 4.706312000  |
| 6    | -2.557265000 | 1.868535000  | 3.678873000  |
| 6    | -2.059441000 | 1.870746000  | 2.361104000  |
| 1    | 0.146883000  | 1.622608000  | 0.384706000  |
| 1    | 1.049468000  | 4.975104000  | 2.750911000  |
| 1    | 3.199068000  | 3.405338000  | 0.193434000  |
| 1    | 2.337818000  | 1.869115000  | 0.211212000  |
| 1    | 1.101278000  | 5.714033000  | 0.678731000  |
| 1    | 1.777344000  | 4.820042000  | -0.679016000 |
| 1    | 4.590005000  | 3.186049000  | 5.729992000  |
| 1    | 2.326304000  | 4.028392000  | 5.194796000  |
| 1    | -2.479187000 | 1.936214000  | -0.801518000 |
| 1    | -3.389659000 | 3.293275000  | -2.659483000 |
| 1    | -0.091506000 | 3.698275000  | 5.220823000  |
| 1    | -2.230981000 | 2.505822000  | 5.735789000  |
| 1    | -3.500977000 | 1.351821000  | 3.906286000  |
| 1    | -2.617388000 | 1.362821000  | 1.563882000  |
| 6    | 6.509395000  | 1.073626000  | 1.680433000  |
| 6    | 5.084536000  | 1.095847000  | 1.567645000  |
| 6    | 4.471802000  | 0.311322000  | 0.533308000  |
| 6    | 5.251926000  | -0.035421000 | -0.614627000 |
| 6    | 6.673593000  | 0.146125000  | -0.601644000 |
| 6    | 7.309593000  | 0.599936000  | 0.590926000  |
| 6    | 8.750908000  | 0.624019000  | 0.685880000  |
| 6    | 7.462691000  | -0.176299000 | -1.768034000 |
| 6    | 4.600193000  | -0.523960000 | -1.812998000 |
| 6    | 7.139067000  | 1.467809000  | 2.923683000  |
| 6    | 3.108992000  | -0.228224000 | 0.625949000  |
| 6    | 8.556716000  | 1.346568000  | 3.084764000  |
| 6    | 9.119262000  | 1.564452000  | 4.364608000  |
| 6    | 8.338015000  | 1.910489000  | 5.481024000  |
| 6    | 6.950594000  | 2.078195000  | 5.288468000  |
| 6    | 6.334043000  | 1.896593000  | 4.033675000  |

### CNG-1C<sub>60</sub>

Gas-phase. BLYP-D3(BJ)/def2-SVP

| Atom | X            | Y            | Z            |
|------|--------------|--------------|--------------|
| 6    | -1.212005000 | 2.084866000  | 1.277890000  |
| 6    | -0.568320000 | 2.712931000  | 2.370255000  |
| 6    | -0.499083000 | 2.387227000  | -0.036544000 |
| 6    | 0.807088000  | 3.153245000  | 0.405192000  |
| 6    | 0.558543000  | 3.615153000  | 1.887159000  |
| 6    | 2.072981000  | 2.253379000  | 0.507085000  |
| 6    | 0.936302000  | 4.364926000  | -0.542906000 |
| 6    | 2.797174000  | 2.715893000  | 1.764374000  |
| 6    | -0.446278000 | 4.533204000  | -1.148865000 |
| 6    | 4.159513000  | 2.536171000  | 2.162255000  |
| 6    | 4.648800000  | 3.340877000  | 3.254513000  |
| 6    | 3.733823000  | 4.118977000  | 4.012167000  |
| 6    | 2.378095000  | 4.184298000  | 3.680680000  |
| 6    | 1.923969000  | 3.507925000  | 2.534185000  |
| 6    | -1.196190000 | 3.360184000  | -0.983795000 |
| 6    | -2.373220000 | 3.160555000  | -1.740865000 |
| 6    | -2.705084000 | 4.079406000  | -2.743953000 |
| 6    | -1.951988000 | 5.274268000  | -2.938942000 |
| 6    | -0.902612000 | 5.571940000  | -2.009320000 |
| 6    | -1.039319000 | 2.521677000  | 3.678569000  |
| 6    | -2.179899000 | 1.720087000  | 3.892116000  |
| 6    | -2.842952000 | 1.122897000  | 2.801421000  |
| 6    | -2.357390000 | 1.299879000  | 1.489384000  |
| 1    | -0.268947000 | 1.439442000  | -0.570967000 |
| 1    | 0.193804000  | 4.657979000  | 1.932245000  |
| 1    | 2.716041000  | 2.297686000  | -0.392386000 |
| 1    | 1.747211000  | 1.204511000  | 0.603922000  |
| 1    | 1.367038000  | 5.242206000  | -0.036156000 |
| 1    | 1.615156000  | 4.123126000  | -1.380512000 |
| 1    | 4.103026000  | 4.731893000  | 4.843422000  |
| 1    | 1.696982000  | 4.815837000  | 4.259425000  |
| 1    | -2.978745000 | 2.252939000  | -1.604273000 |
| 1    | -3.544689000 | 3.851641000  | -3.412595000 |
| 1    | -0.522439000 | 2.991186000  | 4.527285000  |
| 1    | -2.554842000 | 1.562663000  | 4.913911000  |
| 1    | -3.734663000 | 0.503525000  | 2.975322000  |
| 1    | -2.870798000 | 0.821043000  | 0.643306000  |
| 6    | 6.496611000  | 2.039523000  | 1.460658000  |
| 6    | 5.113026000  | 1.669154000  | 1.447318000  |
| 6    | 4.734024000  | 0.505214000  | 0.703370000  |
| 6    | 5.598867000  | 0.034551000  | -0.334439000 |
| 6    | 6.949538000  | 0.494371000  | -0.412457000 |
| 6    | 7.419929000  | 1.444662000  | 0.538572000  |
| 6    | 8.782432000  | 1.922315000  | 0.466886000  |
| 6    | 7.814796000  | 0.028840000  | -1.472804000 |
| 6    | 5.058418000  | -0.801737000 | -1.383799000 |
| 6    | 6.984301000  | 2.969206000  | 2.456930000  |
| 6    | 3.525487000  | -0.277594000 | 0.969518000  |
| 6    | 8.367312000  | 3.330234000  | 2.494765000  |
| 6    | 8.862716000  | 4.043289000  | 3.611012000  |
| 6    | 8.032772000  | 4.423145000  | 4.681288000  |
| 6    | 6.653138000  | 4.145429000  | 4.575443000  |
| 6    | 6.099864000  | 3.465413000  | 3.470882000  |

|   |              |              |              |   |              |              |              |
|---|--------------|--------------|--------------|---|--------------|--------------|--------------|
| 6 | 9.554607000  | 0.282865000  | -0.451655000 | 6 | 9.656108000  | 1.474514000  | -0.577170000 |
| 6 | 10.963661000 | 0.314046000  | -0.325527000 | 6 | 10.903720000 | 2.119044000  | -0.743487000 |
| 6 | 11.604664000 | 0.673190000  | 0.872107000  | 6 | 11.318311000 | 3.182449000  | 0.075183000  |
| 6 | 10.795857000 | 1.007770000  | 1.977885000  | 6 | 10.484855000 | 3.546448000  | 1.153624000  |
| 6 | 9.387638000  | 0.991210000  | 1.920701000  | 6 | 9.238387000  | 2.931340000  | 1.379798000  |
| 6 | 6.821791000  | -0.580621000 | -2.985710000 | 6 | 7.280514000  | -0.768269000 | -2.538426000 |
| 6 | 7.619854000  | -0.855531000 | -4.119465000 | 6 | 8.129880000  | -1.156329000 | -3.597040000 |
| 6 | 9.021864000  | -0.750881000 | -4.096676000 | 6 | 9.484643000  | -0.782730000 | -3.648680000 |
| 6 | 9.633879000  | -0.369809000 | -2.886224000 | 6 | 9.985293000  | 0.019549000  | -2.605228000 |
| 6 | 8.896721000  | -0.087099000 | -1.716749000 | 6 | 9.180154000  | 0.466663000  | -1.537377000 |
| 6 | 3.185703000  | -0.753698000 | -1.825346000 | 6 | 3.685549000  | -1.208958000 | -1.345159000 |
| 6 | 2.547285000  | -1.063948000 | -3.047389000 | 6 | 3.090360000  | -1.731573000 | -2.514257000 |
| 6 | 3.260920000  | -1.196727000 | -4.251474000 | 6 | 3.819565000  | -1.903772000 | -3.707008000 |
| 6 | 4.660902000  | -1.037819000 | -4.205984000 | 6 | 5.200701000  | -1.623607000 | -3.680787000 |
| 6 | 5.354826000  | -0.717854000 | -3.019413000 | 6 | 5.847083000  | -1.096337000 | -2.542663000 |
| 6 | 2.423652000  | -0.353158000 | 1.864874000  | 6 | 2.900690000  | -0.295562000 | 2.242708000  |
| 6 | 1.126218000  | -0.860414000 | 1.943211000  | 6 | 1.704725000  | -0.982303000 | 2.457467000  |
| 6 | 0.442489000  | -1.303747000 | 0.781428000  | 6 | 1.082791000  | -1.715266000 | 1.413031000  |
| 6 | 1.136053000  | -1.231371000 | -0.436559000 | 6 | 1.749011000  | -1.769570000 | 0.176694000  |
| 6 | 2.455163000  | -0.722262000 | -0.550073000 | 6 | 2.964612000  | -1.085960000 | -0.071112000 |
| 6 | 2.570690000  | -1.510520000 | -5.598822000 | 6 | 3.157012000  | -2.325843000 | -5.037672000 |
| 6 | 13.144099000 | 0.714905000  | 1.014301000  | 6 | 12.604152000 | 3.991722000  | -0.205484000 |
| 6 | 9.899046000  | -1.041071000 | -5.336845000 | 6 | 10.415586000 | -1.191771000 | -4.812652000 |
| 6 | 8.944815000  | 2.120845000  | 6.887817000  | 6 | 8.577194000  | 5.128839000  | 5.945076000  |
| 6 | -0.973713000 | -1.922028000 | 0.823814000  | 6 | -0.240394000 | -2.487872000 | 1.610208000  |
| 6 | -1.594865000 | -1.857318000 | 2.239515000  | 6 | -0.914526000 | -2.144840000 | 2.960413000  |
| 6 | -0.885508000 | -3.414288000 | 0.394760000  | 6 | 0.058048000  | -4.013215000 | 1.572028000  |
| 6 | -1.903807000 | -1.160088000 | -0.160060000 | 6 | -1.227399000 | -2.124304000 | 0.466542000  |
| 6 | 1.039297000  | -1.672005000 | -5.448260000 | 6 | 1.653606000  | -2.647169000 | -4.866822000 |
| 6 | 3.145279000  | -2.834459000 | -6.176782000 | 6 | 3.864778000  | -3.586180000 | -5.607102000 |
| 6 | 2.843125000  | -0.348130000 | -6.594933000 | 6 | 3.295478000  | -1.148059000 | -6.045672000 |
| 6 | 9.056552000  | -1.447570000 | -6.569167000 | 6 | 9.668131000  | -1.997163000 | -5.901960000 |
| 6 | 10.880980000 | -2.201520000 | -5.011024000 | 6 | 11.572014000 | -2.067460000 | -4.254906000 |
| 6 | 10.708257000 | 0.236242000  | -5.699235000 | 6 | 11.001728000 | 0.086607000  | -5.475765000 |
| 6 | 13.865618000 | 0.333938000  | -0.299975000 | 6 | 13.392575000 | 3.437456000  | -1.415861000 |
| 6 | 13.581244000 | -0.286713000 | 2.120129000  | 6 | 13.528395000 | 3.956990000  | 1.042828000  |
| 6 | 13.582660000 | 2.151997000  | 1.413627000  | 6 | 12.203728000 | 5.461863000  | -0.520507000 |
| 6 | 10.479965000 | 1.928791000  | 6.900171000  | 6 | 10.114875000 | 5.295585000  | 5.907110000  |
| 6 | 8.315775000  | 1.096534000  | 7.873491000  | 6 | 8.210125000  | 4.285090000  | 7.198084000  |
| 6 | 8.632706000  | 3.565251000  | 7.371182000  | 6 | 7.938428000  | 6.540183000  | 6.065635000  |
| 1 | 10.197125000 | 1.437285000  | 4.490421000  | 1 | 9.933619000  | 4.260138000  | 3.654065000  |
| 1 | 6.330088000  | 2.366075000  | 6.144335000  | 1 | 5.986109000  | 4.472604000  | 5.380771000  |
| 1 | 11.573835000 | 0.047415000  | -1.191429000 | 1 | 11.538633000 | 1.820884000  | -1.580124000 |
| 1 | 11.283156000 | 1.304316000  | 2.912858000  | 1 | 10.787547000 | 4.372812000  | 1.807209000  |
| 1 | 7.128381000  | -1.169788000 | -5.043127000 | 1 | 7.715011000  | -1.766004000 | -4.402872000 |
| 1 | 10.725525000 | -0.290906000 | -2.855961000 | 1 | 11.031994000 | 0.336639000  | -2.647275000 |
| 1 | 1.462125000  | -1.194036000 | -3.051383000 | 1 | 2.023296000  | -1.971514000 | -2.492484000 |
| 1 | 5.228739000  | -1.153087000 | -5.135054000 | 1 | 5.782955000  | -1.766212000 | -4.596972000 |
| 1 | 2.928084000  | -0.056410000 | 2.789376000  | 1 | 3.356968000  | 0.257999000  | 3.070988000  |
| 1 | 0.650191000  | -0.924820000 | 2.928047000  | 1 | 1.252069000  | -0.946813000 | 3.454701000  |
| 1 | 0.652891000  | -1.625208000 | -1.337602000 | 1 | 1.331346000  | -2.391924000 | -0.623483000 |
| 1 | -2.621733000 | -2.273371000 | 2.217066000  | 1 | -1.885700000 | -2.672964000 | 3.037875000  |
| 1 | -1.657526000 | -0.818714000 | 2.614813000  | 1 | -1.111140000 | -1.060269000 | 3.055312000  |
| 1 | -1.011732000 | -2.453124000 | 2.968847000  | 1 | -0.296704000 | -2.464722000 | 3.822402000  |
| 1 | -0.496482000 | -3.522871000 | -0.636417000 | 1 | 0.511535000  | -4.313230000 | 0.606994000  |
| 1 | -1.887932000 | -3.888241000 | 0.431210000  | 1 | -0.875832000 | -4.596709000 | 1.707870000  |
| 1 | -0.212121000 | -3.977548000 | 1.070881000  | 1 | 0.763350000  | -4.296234000 | 2.378608000  |
| 1 | -1.534841000 | -1.211512000 | -1.202450000 | 1 | -0.840036000 | -2.422973000 | -0.526581000 |
| 1 | -1.973731000 | -0.091700000 | 0.117338000  | 1 | -1.413212000 | -1.034208000 | 0.449036000  |
| 1 | -2.926023000 | -1.589714000 | -0.141304000 | 1 | -2.197833000 | -2.639879000 | 0.615461000  |

|   |              |              |              |   |              |              |              |
|---|--------------|--------------|--------------|---|--------------|--------------|--------------|
| 1 | 0.588316000  | -1.902378000 | -6.433591000 | 1 | 1.221917000  | -2.951391000 | -5.840722000 |
| 1 | 0.562747000  | -0.745890000 | -5.070929000 | 1 | 1.083273000  | -1.766862000 | -4.510997000 |
| 1 | 0.779344000  | -2.500064000 | -4.759691000 | 1 | 1.489328000  | -3.477779000 | -4.152014000 |
| 1 | 2.659756000  | -3.076489000 | -7.144216000 | 1 | 3.400641000  | -3.887593000 | -6.568052000 |
| 1 | 2.968680000  | -3.678330000 | -5.480372000 | 1 | 3.783968000  | -4.437096000 | -4.901589000 |
| 1 | 4.235872000  | -2.767152000 | -6.355890000 | 1 | 4.940322000  | -3.406106000 | -5.798090000 |
| 1 | 2.357946000  | -0.552799000 | -7.571243000 | 1 | 2.819449000  | -1.406275000 | -7.013817000 |
| 1 | 3.926401000  | -0.210324000 | -6.778707000 | 1 | 4.355483000  | -0.898865000 | -6.244085000 |
| 1 | 2.442931000  | 0.608019000  | -6.203081000 | 1 | 2.808746000  | -0.233512000 | -5.653287000 |
| 1 | 9.723710000  | -1.641906000 | -7.431981000 | 1 | 10.367949000 | -2.262449000 | -6.718644000 |
| 1 | 8.350777000  | -0.646992000 | -6.866051000 | 1 | 8.841065000  | -1.409878000 | -6.347138000 |
| 1 | 8.473296000  | -2.370970000 | -6.383220000 | 1 | 9.247770000  | -2.941069000 | -5.502519000 |
| 1 | 11.522597000 | -2.425353000 | -5.887765000 | 1 | 12.260538000 | -2.366726000 | -5.071454000 |
| 1 | 10.327169000 | -3.123218000 | -4.742831000 | 1 | 11.176016000 | -2.987503000 | -3.780654000 |
| 1 | 11.546217000 | -1.949134000 | -4.162728000 | 1 | 12.166317000 | -1.525152000 | -3.493666000 |
| 1 | 11.340976000 | 0.054080000  | -6.591877000 | 1 | 11.676276000 | -0.188431000 | -6.311824000 |
| 1 | 11.374292000 | 0.548769000  | -4.871755000 | 1 | 11.585744000 | 0.695010000  | -4.759009000 |
| 1 | 10.028622000 | 1.082346000  | -5.923331000 | 1 | 10.195424000 | 0.728221000  | -5.879725000 |
| 1 | 13.610826000 | 1.028092000  | -1.124957000 | 1 | 12.794055000 | 3.478252000  | -2.347098000 |
| 1 | 13.613757000 | -0.694991000 | -0.624466000 | 1 | 13.712642000 | 2.389146000  | -1.253821000 |
| 1 | 14.962778000 | 0.378326000  | -0.152664000 | 1 | 14.304619000 | 4.044731000  | -1.578899000 |
| 1 | 13.278162000 | -1.319826000 | 1.857537000  | 1 | 13.821878000 | 2.916536000  | 1.287299000  |
| 1 | 13.126037000 | -0.040884000 | 3.099169000  | 1 | 13.032856000 | 4.386648000  | 1.935024000  |
| 1 | 14.683192000 | -0.270066000 | 2.246045000  | 1 | 14.451666000 | 4.542626000  | 0.857073000  |
| 1 | 13.273960000 | 2.886396000  | 0.643250000  | 1 | 11.553884000 | 5.509687000  | -1.415693000 |
| 1 | 14.685325000 | 2.205510000  | 1.521542000  | 1 | 13.106860000 | 6.076126000  | -0.713609000 |
| 1 | 13.134596000 | 2.464814000  | 2.376383000  | 1 | 11.650108000 | 5.925628000  | 0.318637000  |
| 1 | 10.989170000 | 2.646999000  | 6.227650000  | 1 | 10.441533000 | 5.919066000  | 5.051564000  |
| 1 | 10.770057000 | 0.904121000  | 6.595025000  | 1 | 10.632019000 | 4.318380000  | 5.839551000  |
| 1 | 10.869671000 | 2.095426000  | 7.923769000  | 1 | 10.460269000 | 5.795415000  | 6.833551000  |
| 1 | 8.525955000  | 0.057854000  | 7.549249000  | 1 | 8.645644000  | 3.268470000  | 7.129296000  |
| 1 | 7.216672000  | 1.212928000  | 7.940227000  | 1 | 7.114675000  | 4.175478000  | 7.314967000  |
| 1 | 8.732574000  | 1.231940000  | 8.892554000  | 1 | 8.600042000  | 4.767647000  | 8.117520000  |
| 1 | 9.063151000  | 4.314415000  | 6.677158000  | 1 | 8.215146000  | 7.170863000  | 5.198170000  |
| 1 | 9.063295000  | 3.738482000  | 8.378676000  | 1 | 8.289866000  | 7.048392000  | 6.986614000  |
| 1 | 7.543239000  | 3.751469000  | 7.434648000  | 1 | 6.833563000  | 6.491143000  | 6.105055000  |
| 6 | -0.638190000 | 7.373944000  | -3.161986000 | 6 | -0.254468000 | 7.597713000  | -3.273335000 |
| 6 | -0.478150000 | 6.868413000  | -1.833518000 | 6 | -0.271143000 | 6.889445000  | -2.037092000 |
| 6 | 0.166813000  | 7.707845000  | -0.862996000 | 6 | 0.337491000  | 7.483144000  | -0.888267000 |
| 6 | 1.046757000  | 8.737454000  | -1.323759000 | 6 | 1.318889000  | 8.498005000  | -1.089293000 |
| 6 | 1.061280000  | 9.106663000  | -2.708446000 | 6 | 1.470000000  | 9.113727000  | -2.371463000 |
| 6 | 0.135746000  | 8.495432000  | -3.603987000 | 6 | 0.620344000  | 8.717786000  | -3.445524000 |
| 6 | 0.010466000  | 8.973449000  | -4.961523000 | 6 | 0.754371000  | 9.331144000  | -4.744051000 |
| 6 | 1.968914000  | 10.125169000 | -3.184511000 | 6 | 2.506287000  | 10.096872000 | -2.582363000 |
| 6 | 1.962320000  | 9.376651000  | -0.399353000 | 6 | 2.275280000  | 8.767619000  | -0.037631000 |
| 6 | -1.635937000 | 6.795853000  | -4.036987000 | 6 | -1.145244000 | 7.191509000  | -4.337615000 |
| 6 | -0.093731000 | 7.621955000  | 0.580041000  | 6 | -0.034531000 | 7.166178000  | 0.498113000  |
| 6 | -1.886100000 | 7.371639000  | -5.327412000 | 6 | -1.123555000 | 7.891069000  | -5.588550000 |
| 6 | -2.994292000 | 6.911319000  | -6.069490000 | 6 | -2.115480000 | 7.593897000  | -6.546369000 |
| 6 | -3.851327000 | 5.893678000  | -5.602137000 | 6 | -3.110034000 | 6.616916000  | -6.327502000 |
| 6 | -3.549674000 | 5.296894000  | -4.364684000 | 6 | -3.075008000 | 5.896327000  | -5.118492000 |
| 6 | -2.444404000 | 5.703206000  | -3.581932000 | 6 | -2.100922000 | 6.139703000  | -4.123270000 |
| 6 | 0.889891000  | 10.000201000 | -5.448473000 | 6 | 1.776882000  | 10.314516000 | -4.972570000 |
| 6 | 0.740223000  | 10.442162000 | -6.780297000 | 6 | 1.980534000  | 10.777082000 | -6.289178000 |
| 6 | -0.233477000 | 9.915146000  | -7.651612000 | 6 | 1.229350000  | 10.307341000 | -7.384349000 |
| 6 | -1.083577000 | 8.910210000  | -7.156263000 | 6 | 0.199257000  | 9.382618000  | -7.130780000 |
| 6 | -0.989772000 | 8.426776000  | -5.831574000 | 6 | -0.065561000 | 8.888648000  | -5.834045000 |
| 6 | 2.935908000  | 10.705358000 | -2.293862000 | 6 | 3.471007000  | 10.359199000 | -1.548656000 |
| 6 | 3.828704000  | 11.671659000 | -2.800452000 | 6 | 4.489867000  | 11.299992000 | -1.792333000 |
| 6 | 3.811109000  | 12.091128000 | -4.146440000 | 6 | 4.621381000  | 11.967808000 | -3.027498000 |

|   |              |              |              |   |              |              |              |
|---|--------------|--------------|--------------|---|--------------|--------------|--------------|
| 6 | 2.846559000  | 11.526050000 | -4.997434000 | 6 | 3.700231000  | 11.659185000 | -4.042994000 |
| 6 | 1.915596000  | 10.558953000 | -4.550957000 | 6 | 2.652150000  | 10.726318000 | -3.860871000 |
| 6 | 1.927420000  | 9.047408000  | 0.997675000  | 6 | 2.168125000  | 8.086905000  | 1.220701000  |
| 6 | 2.933773000  | 9.552350000  | 1.844887000  | 6 | 3.287271000  | 8.043784000  | 2.071360000  |
| 6 | 3.955073000  | 10.405572000 | 1.379463000  | 6 | 4.497854000  | 8.694712000  | 1.739315000  |
| 6 | 3.933168000  | 10.773021000 | 0.023003000  | 6 | 4.518591000  | 9.502609000  | 0.587069000  |
| 6 | 2.955448000  | 10.291432000 | -0.879701000 | 6 | 3.420993000  | 9.577056000  | -0.303512000 |
| 6 | -1.253431000 | 6.990693000  | 1.105754000  | 6 | -1.317955000 | 6.671844000  | 0.846046000  |
| 6 | -1.478893000 | 6.888534000  | 2.478974000  | 6 | -1.695776000 | 6.495235000  | 2.178765000  |
| 6 | -0.567899000 | 7.446045000  | 3.413266000  | 6 | -0.813204000 | 6.805538000  | 3.246199000  |
| 6 | 0.543423000  | 8.129349000  | 2.895410000  | 6 | 0.466200000  | 7.281354000  | 2.904007000  |
| 6 | 0.802109000  | 8.248747000  | 1.506495000  | 6 | 0.872848000  | 7.478774000  | 1.559672000  |
| 6 | -5.069920000 | 5.472365000  | -6.456399000 | 6 | -4.183712000 | 6.369223000  | -7.412875000 |
| 6 | -0.784152000 | 7.381398000  | 4.942178000  | 6 | -1.275914000 | 6.760318000  | 4.722200000  |
| 6 | 5.036623000  | 10.908122000 | 2.363567000  | 6 | 5.756156000  | 8.440478000  | 2.596346000  |
| 6 | 4.826235000  | 13.154105000 | -4.627142000 | 6 | 5.775806000  | 12.976054000 | -3.229114000 |
| 6 | -0.328537000 | 10.448159000 | -9.100076000 | 6 | 1.605298000  | 10.764821000 | -8.812283000 |
| 6 | -2.028451000 | 6.542372000  | 5.317857000  | 6 | -2.595101000 | 5.967017000  | 4.892517000  |
| 6 | -0.980369000 | 8.823202000  | 5.491000000  | 6 | -1.507319000 | 8.226449000  | 5.191621000  |
| 6 | 0.466027000  | 6.744161000  | 5.611108000  | 6 | -0.207056000 | 6.102794000  | 5.633153000  |
| 6 | 4.354376000  | 11.717555000 | 3.502521000  | 6 | 5.473731000  | 8.826299000  | 4.074245000  |
| 6 | 6.077617000  | 11.822655000 | 1.675786000  | 6 | 6.977815000  | 9.250496000  | 2.102724000  |
| 6 | 5.783357000  | 9.687050000  | 2.970155000  | 6 | 6.101826000  | 6.926745000  | 2.502496000  |
| 6 | 4.587742000  | 14.475679000 | -3.843329000 | 6 | 7.132373000  | 12.248168000 | -3.013145000 |
| 6 | 4.689771000  | 13.454389000 | -6.138780000 | 6 | 5.629498000  | 14.128222000 | -2.196664000 |
| 6 | 6.270700000  | 12.646129000 | -4.359656000 | 6 | 5.777829000  | 13.588309000 | -4.649753000 |
| 6 | -0.608985000 | 11.976839000 | -9.065842000 | 6 | 3.045707000  | 10.265108000 | -9.123758000 |
| 6 | -1.460598000 | 9.765356000  | -9.903709000 | 6 | 1.558150000  | 12.315451000 | -8.895531000 |
| 6 | 1.017495000  | 10.183937000 | -9.832188000 | 6 | 0.647460000  | 10.190643000 | -9.882683000 |
| 6 | -4.577025000 | 4.974455000  | -7.844212000 | 6 | -3.487242000 | 5.976791000  | -8.746289000 |
| 6 | -6.007359000 | 6.697826000  | -6.646801000 | 6 | -5.005796000 | 7.672345000  | -7.619862000 |
| 6 | -5.884008000 | 4.335733000  | -5.794290000 | 6 | -5.159961000 | 5.234035000  | -7.024267000 |
| 1 | -3.212837000 | 7.377477000  | -7.036248000 | 1 | -2.127364000 | 8.159255000  | -7.485069000 |
| 1 | -4.186529000 | 4.491726000  | -3.989732000 | 1 | -3.814405000 | 5.110170000  | -4.943425000 |
| 1 | 1.404180000  | 11.228340000 | -7.154539000 | 1 | 2.787993000  | 11.490862000 | -6.480175000 |
| 1 | -1.835105000 | 8.475607000  | -7.819885000 | 1 | -0.390012000 | 8.996452000  | -7.966568000 |
| 1 | 4.561297000  | 12.123223000 | -2.123421000 | 1 | 5.209114000  | 11.514709000 | -0.994001000 |
| 1 | 2.813121000  | 11.843795000 | -6.042024000 | 1 | 3.809305000  | 12.140888000 | -5.016925000 |
| 1 | 2.927927000  | 9.263636000  | 2.901569000  | 1 | 3.230237000  | 7.431327000  | 2.979877000  |
| 1 | 4.708757000  | 11.443996000 | -0.353578000 | 1 | 5.436623000  | 10.035514000 | 0.326982000  |
| 1 | -1.996499000 | 6.575547000  | 0.418151000  | 1 | -2.046458000 | 6.460123000  | 0.056346000  |
| 1 | -2.385601000 | 6.378518000  | 2.823062000  | 1 | -2.708354000 | 6.132696000  | 2.386867000  |
| 1 | 1.224936000  | 8.624386000  | 3.596032000  | 1 | 1.162632000  | 7.577635000  | 3.698179000  |
| 1 | -2.958988000 | 6.994099000  | 4.921551000  | 1 | -3.443261000 | 6.456459000  | 4.376210000  |
| 1 | -2.127998000 | 6.491562000  | 6.420472000  | 1 | -2.858146000 | 5.904749000  | 5.967162000  |
| 1 | -1.958214000 | 5.506986000  | 4.935573000  | 1 | -2.502024000 | 4.934556000  | 4.502151000  |
| 1 | -1.865040000 | 9.302779000  | 5.026946000  | 1 | -2.264458000 | 8.727417000  | 4.556607000  |
| 1 | -0.101214000 | 9.463749000  | 5.283495000  | 1 | -0.572598000 | 8.817875000  | 5.132092000  |
| 1 | -1.134331000 | 8.802134000  | 6.589397000  | 1 | -1.864476000 | 8.248688000  | 6.241904000  |
| 1 | 0.654419000  | 5.732632000  | 5.205665000  | 1 | -0.054892000 | 5.041010000  | 5.361813000  |
| 1 | 0.320665000  | 6.658131000  | 6.707167000  | 1 | -0.535752000 | 6.136358000  | 6.691118000  |
| 1 | 1.378470000  | 7.346895000  | 5.438615000  | 1 | 0.770850000  | 6.617506000  | 5.575186000  |
| 1 | 3.624042000  | 11.102673000 | 4.063349000  | 1 | 4.649335000  | 8.225883000  | 4.505447000  |
| 1 | 3.813589000  | 12.593588000 | 3.092370000  | 1 | 5.195095000  | 9.895930000  | 4.158161000  |
| 1 | 5.111769000  | 12.084953000 | 4.224829000  | 1 | 6.372588000  | 8.652442000  | 4.696812000  |
| 1 | 6.617963000  | 11.295184000 | 0.865073000  | 1 | 7.256877000  | 8.981369000  | 1.064993000  |
| 1 | 6.830546000  | 12.156691000 | 2.416681000  | 1 | 7.852794000  | 9.035179000  | 2.747479000  |
| 1 | 5.609191000  | 12.729682000 | 1.245201000  | 1 | 6.793933000  | 10.342807000 | 2.140780000  |
| 1 | 6.276222000  | 9.091513000  | 2.176211000  | 1 | 6.271254000  | 6.624230000  | 1.451492000  |
| 1 | 5.094318000  | 9.014353000  | 3.516440000  | 1 | 5.285801000  | 6.295216000  | 2.898718000  |

|   |              |              |               |   |              |              |               |
|---|--------------|--------------|---------------|---|--------------|--------------|---------------|
| 1 | 6.561931000  | 10.024517000 | 3.684464000   | 1 | 7.017279000  | 6.689710000  | 3.077295000   |
| 1 | 5.304243000  | 15.256434000 | -4.171221000  | 1 | 7.976312000  | 12.956070000 | -3.141797000  |
| 1 | 4.717179000  | 14.334959000 | -2.752639000  | 1 | 7.254925000  | 11.423435000 | -3.741316000  |
| 1 | 3.560493000  | 14.854176000 | -4.014917000  | 1 | 7.209445000  | 11.810014000 | -1.999583000  |
| 1 | 4.856141000  | 12.548462000 | -6.754429000  | 1 | 4.665519000  | 14.658105000 | -2.331844000  |
| 1 | 5.443339000  | 14.208253000 | -6.440658000  | 1 | 6.449751000  | 14.865080000 | -2.317565000  |
| 1 | 3.691176000  | 13.863565000 | -6.389192000  | 1 | 5.664853000  | 13.752561000 | -1.155664000  |
| 1 | 6.463911000  | 11.699489000 | -4.902614000  | 1 | 4.841723000  | 14.141514000 | -4.861960000  |
| 1 | 6.447580000  | 12.458526000 | -3.283022000  | 1 | 5.907608000  | 12.813298000 | -5.430708000  |
| 1 | 7.014158000  | 13.396931000 | -4.697006000  | 1 | 6.618339000  | 14.303161000 | -4.747989000  |
| 1 | -0.680394000 | 12.381090000 | -10.096297000 | 1 | 3.350414000  | 10.566212000 | -10.147065000 |
| 1 | 0.193947000  | 12.530877000 | -8.542110000  | 1 | 3.103509000  | 9.160835000  | -9.054328000  |
| 1 | -1.562716000 | 12.191201000 | -8.543640000  | 1 | 3.786544000  | 10.679253000 | -8.412798000  |
| 1 | -1.494009000 | 10.180232000 | -10.930484000 | 1 | 1.829421000  | 12.657094000 | -9.915147000  |
| 1 | -2.452954000 | 9.935581000  | -9.441589000  | 1 | 2.263230000  | 12.789369000 | -8.185528000  |
| 1 | -1.303003000 | 8.672244000  | -9.990858000  | 1 | 0.541593000  | 12.691407000 | -8.664020000  |
| 1 | 0.974018000  | 10.563851000 | -10.873419000 | 1 | 0.944773000  | 10.554166000 | -10.886028000 |
| 1 | 1.239227000  | 9.098775000  | -9.868754000  | 1 | -0.400222000 | 10.506374000 | -9.707969000  |
| 1 | 1.865555000  | 10.683943000 | -9.325402000  | 1 | 0.675455000  | 9.083622000  | -9.908815000  |
| 1 | -3.897539000 | 4.106249000  | -7.731685000  | 1 | -2.882748000 | 5.056889000  | -8.618122000  |
| 1 | -4.027699000 | 5.763429000  | -8.393539000  | 1 | -2.812827000 | 6.776258000  | -9.109065000  |
| 1 | -5.436298000 | 4.662639000  | -8.472621000  | 1 | -4.241811000 | 5.788402000  | -9.537107000  |
| 1 | -6.889819000 | 6.420885000  | -7.259343000  | 1 | -5.785181000 | 7.521379000  | -8.394712000  |
| 1 | -5.491471000 | 7.534109000  | -7.157293000  | 1 | -4.364958000 | 8.514622000  | -7.945380000  |
| 1 | -6.369306000 | 7.072185000  | -5.668590000  | 1 | -5.507726000 | 7.974469000  | -6.679171000  |
| 1 | -5.274562000 | 3.420908000  | -5.656203000  | 1 | -4.633242000 | 4.269953000  | -6.881049000  |
| 1 | -6.747326000 | 4.068098000  | -6.435182000  | 1 | -5.907758000 | 5.089625000  | -7.828985000  |
| 1 | -6.282516000 | 4.637484000  | -4.805696000  | 1 | -5.713959000 | 5.465936000  | -6.093286000  |
|   |              |              |               | 6 | 2.925755000  | 6.316743000  | -5.764404000  |
|   |              |              |               | 6 | 3.320064000  | 7.404701000  | -4.962485000  |
|   |              |              |               | 6 | 2.636673000  | 5.020115000  | -5.143994000  |
|   |              |              |               | 6 | 3.438922000  | 7.239960000  | -3.512394000  |
|   |              |              |               | 6 | 2.750493000  | 4.866951000  | -3.745248000  |
|   |              |              |               | 6 | 3.149352000  | 6.002691000  | -2.909045000  |
|   |              |              |               | 6 | 3.605267000  | 6.070777000  | -7.041064000  |
|   |              |              |               | 6 | 4.397105000  | 8.295205000  | -5.404839000  |
|   |              |              |               | 6 | 3.140646000  | 3.971820000  | -6.035705000  |
|   |              |              |               | 6 | 3.738080000  | 4.620623000  | -7.208348000  |
|   |              |              |               | 6 | 4.587175000  | 8.027325000  | -3.059829000  |
|   |              |              |               | 6 | 4.642234000  | 6.927934000  | -7.467225000  |
|   |              |              |               | 6 | 5.043490000  | 8.066594000  | -6.633927000  |
|   |              |              |               | 6 | 5.177422000  | 8.682217000  | -4.226796000  |
|   |              |              |               | 6 | 3.363296000  | 3.659783000  | -3.186213000  |
|   |              |              |               | 6 | 4.007216000  | 5.501955000  | -1.829481000  |
|   |              |              |               | 6 | 3.727756000  | 2.806501000  | -5.498145000  |
|   |              |              |               | 6 | 3.839943000  | 2.646332000  | -4.044536000  |
|   |              |              |               | 6 | 4.141192000  | 4.053271000  | -2.004001000  |
|   |              |              |               | 6 | 5.403452000  | 7.554695000  | -2.016769000  |
|   |              |              |               | 6 | 4.902327000  | 4.081709000  | -7.795112000  |
|   |              |              |               | 6 | 5.111908000  | 6.262684000  | -1.391886000  |
|   |              |              |               | 6 | 5.852232000  | 6.367876000  | -8.074289000  |
|   |              |              |               | 6 | 6.500358000  | 8.210865000  | -6.728439000  |
|   |              |              |               | 6 | 6.573982000  | 8.831697000  | -4.315697000  |
|   |              |              |               | 6 | 5.979335000  | 4.972582000  | -8.235940000  |
|   |              |              |               | 6 | 4.939707000  | 2.247900000  | -6.109354000  |
|   |              |              |               | 6 | 7.250185000  | 8.585653000  | -5.592412000  |
|   |              |              |               | 6 | 6.999412000  | 7.160185000  | -7.618697000  |
|   |              |              |               | 6 | 5.514265000  | 2.871750000  | -7.237389000  |
|   |              |              |               | 6 | 6.858960000  | 7.704976000  | -2.108539000  |
|   |              |              |               | 6 | 5.369060000  | 3.422291000  | -1.728726000  |



|   |             |             |              |
|---|-------------|-------------|--------------|
| 6 | 5.119418000 | 1.991343000 | -3.759665000 |
| 6 | 7.432929000 | 8.329801000 | -3.237668000 |
| 6 | 6.391190000 | 5.606795000 | -1.102032000 |
| 6 | 5.798253000 | 1.741328000 | -5.035330000 |
| 6 | 5.866857000 | 2.385372000 | -2.633915000 |
| 6 | 6.516912000 | 4.212915000 | -1.268456000 |
| 6 | 7.257264000 | 4.315850000 | -7.950003000 |
| 6 | 7.472049000 | 6.498053000 | -1.544979000 |
| 6 | 6.969976000 | 3.017196000 | -7.333707000 |
| 6 | 8.229474000 | 6.527046000 | -7.343020000 |
| 6 | 8.527327000 | 7.927492000 | -5.304590000 |
| 6 | 8.639777000 | 7.769299000 | -3.850100000 |
| 6 | 8.360884000 | 5.077588000 | -7.513198000 |
| 6 | 9.007278000 | 6.917081000 | -6.163214000 |
| 6 | 7.199233000 | 1.884381000 | -5.129500000 |
| 6 | 7.316797000 | 2.540294000 | -2.739569000 |
| 6 | 7.722975000 | 3.661656000 | -1.892540000 |
| 6 | 7.797304000 | 2.531509000 | -6.300382000 |
| 6 | 8.636300000 | 5.959676000 | -2.135866000 |
| 6 | 9.230491000 | 6.607349000 | -3.309670000 |
| 6 | 7.973287000 | 2.288540000 | -3.955183000 |
| 6 | 8.767294000 | 4.509995000 | -2.307932000 |
| 6 | 9.221980000 | 4.573156000 | -6.438773000 |
| 6 | 9.621242000 | 5.710044000 | -5.603897000 |
| 6 | 8.945208000 | 3.325578000 | -5.843846000 |
| 6 | 9.730053000 | 5.557444000 | -4.204711000 |
| 6 | 9.055798000 | 3.169236000 | -4.390804000 |
| 6 | 9.445387000 | 4.260788000 | -3.584476000 |

### CNG-1D<sub>C<sub>70</sub></sub>

Gas-phase. BLYP-D3(BJ)/def2-SVP

| Atom | X            | Y           | Z            |
|------|--------------|-------------|--------------|
| 6    | -1.220899000 | 2.195356000 | 1.357289000  |
| 6    | -0.556944000 | 2.766883000 | 2.468355000  |
| 6    | -0.489004000 | 2.496919000 | 0.052370000  |
| 6    | 0.820602000  | 3.246889000 | 0.510019000  |
| 6    | 0.597008000  | 3.648346000 | 2.013499000  |
| 6    | 2.091674000  | 2.346248000 | 0.543776000  |
| 6    | 0.938588000  | 4.500992000 | -0.383190000 |
| 6    | 2.826040000  | 2.732203000 | 1.819290000  |
| 6    | -0.416003000 | 4.649178000 | -1.050199000 |
| 6    | 4.190976000  | 2.518906000 | 2.191823000  |
| 6    | 4.700223000  | 3.266995000 | 3.313995000  |
| 6    | 3.800367000  | 4.013056000 | 4.121084000  |
| 6    | 2.440689000  | 4.100567000 | 3.814225000  |
| 6    | 1.967041000  | 3.487279000 | 2.639825000  |
| 6    | -1.161442000 | 3.469446000 | -0.911006000 |
| 6    | -2.307456000 | 3.255646000 | -1.710341000 |
| 6    | -2.613217000 | 4.169313000 | -2.725190000 |
| 6    | -1.863687000 | 5.369564000 | -2.898724000 |
| 6    | -0.846494000 | 5.680003000 | -1.937404000 |
| 6    | -1.041603000 | 2.560698000 | 3.769725000  |
| 6    | -2.215648000 | 1.802494000 | 3.958091000  |
| 6    | -2.898932000 | 1.264432000 | 2.849286000  |
| 6    | -2.399766000 | 1.454791000 | 1.544446000  |
| 1    | -0.260368000 | 1.545120000 | -0.475707000 |
| 1    | 0.264221000  | 4.699948000 | 2.108255000  |
| 1    | 2.728336000  | 2.455620000 | -0.354781000 |
| 1    | 1.774861000  | 1.290383000 | 0.567756000  |

|   |              |              |              |
|---|--------------|--------------|--------------|
| 1 | 1.306856000  | 5.367974000  | 0.184065000  |
| 1 | 1.677991000  | 4.341663000  | -1.188921000 |
| 1 | 4.183134000  | 4.581223000  | 4.977340000  |
| 1 | 1.771915000  | 4.705625000  | 4.435102000  |
| 1 | -2.905224000 | 2.339761000  | -1.597147000 |
| 1 | -3.427195000 | 3.931824000  | -3.421302000 |
| 1 | -0.509585000 | 2.985085000  | 4.632950000  |
| 1 | -2.601886000 | 1.634311000  | 4.973932000  |
| 1 | -3.817515000 | 0.679979000  | 3.003035000  |
| 1 | -2.930482000 | 1.021823000  | 0.684588000  |
| 6 | 6.515607000  | 1.994067000  | 1.464508000  |
| 6 | 5.123154000  | 1.659083000  | 1.439072000  |
| 6 | 4.719477000  | 0.515125000  | 0.674657000  |
| 6 | 5.580762000  | 0.028828000  | -0.360293000 |
| 6 | 6.942716000  | 0.458607000  | -0.425681000 |
| 6 | 7.428147000  | 1.390644000  | 0.536504000  |
| 6 | 8.809004000  | 1.815403000  | 0.496523000  |
| 6 | 7.813130000  | -0.037201000 | -1.468365000 |
| 6 | 5.045920000  | -0.835488000 | -1.391072000 |
| 6 | 7.026322000  | 2.878765000  | 2.491452000  |
| 6 | 3.497273000  | -0.248370000 | 0.939791000  |
| 6 | 8.419912000  | 3.195737000  | 2.547622000  |
| 6 | 8.928328000  | 3.871961000  | 3.680733000  |
| 6 | 8.105055000  | 4.252091000  | 4.755266000  |
| 6 | 6.721058000  | 4.003764000  | 4.642951000  |
| 6 | 6.154047000  | 3.363215000  | 3.521825000  |
| 6 | 9.684435000  | 1.347368000  | -0.536736000 |
| 6 | 10.970296000 | 1.926186000  | -0.655672000 |
| 6 | 11.423777000 | 2.940589000  | 0.202639000  |
| 6 | 10.577371000 | 3.331324000  | 1.261286000  |
| 6 | 9.292557000  | 2.782454000  | 1.439507000  |
| 6 | 7.284130000  | -0.854963000 | -2.521497000 |
| 6 | 8.138616000  | -1.255378000 | -3.572293000 |
| 6 | 9.492488000  | -0.882412000 | -3.625338000 |
| 6 | 9.995364000  | -0.085452000 | -2.579875000 |
| 6 | 9.188594000  | 0.371606000  | -1.517717000 |
| 6 | 3.673324000  | -1.245887000 | -1.348785000 |
| 6 | 3.106546000  | -1.870858000 | -2.481403000 |
| 6 | 3.862008000  | -2.153362000 | -3.635019000 |
| 6 | 5.234124000  | -1.834724000 | -3.615960000 |
| 6 | 5.853489000  | -1.197954000 | -2.519174000 |
| 6 | 2.869612000  | -0.253796000 | 2.212702000  |
| 6 | 1.656997000  | -0.909928000 | 2.426066000  |
| 6 | 1.019001000  | -1.626216000 | 1.379974000  |
| 6 | 1.693624000  | -1.708176000 | 0.150522000  |
| 6 | 2.929721000  | -1.059769000 | -0.094837000 |
| 6 | 3.244481000  | -2.784706000 | -4.903698000 |
| 6 | 12.770414000 | 3.668443000  | -0.009476000 |
| 6 | 10.421201000 | -1.282133000 | -4.794337000 |
| 6 | 8.660834000  | 4.931741000  | 6.027951000  |
| 6 | -0.331514000 | -2.352631000 | 1.566689000  |
| 6 | -0.991475000 | -2.006475000 | 2.922785000  |
| 6 | -0.093757000 | -3.887784000 | 1.503210000  |
| 6 | -1.302942000 | -1.932324000 | 0.428800000  |
| 6 | 1.744615000  | -3.116364000 | -4.721836000 |
| 6 | 3.997482000  | -4.100016000 | -5.247420000 |
| 6 | 3.383912000  | -1.781426000 | -6.082875000 |
| 6 | 9.663183000  | -2.050322000 | -5.903002000 |
| 6 | 11.561472000 | -2.186945000 | -4.250044000 |
| 6 | 11.031607000 | 0.000179000  | -5.428373000 |

|   |              |              |              |
|---|--------------|--------------|--------------|
| 6 | 13.554179000 | 3.107282000  | -1.219704000 |
| 6 | 13.650779000 | 3.517984000  | 1.261529000  |
| 6 | 12.482695000 | 5.173907000  | -0.274617000 |
| 6 | 10.201748000 | 5.066433000  | 5.996235000  |
| 6 | 8.271964000  | 4.085944000  | 7.272752000  |
| 6 | 8.051306000  | 6.355255000  | 6.156523000  |
| 1 | 10.004189000 | 4.058340000  | 3.734794000  |
| 1 | 6.061411000  | 4.325337000  | 5.456210000  |
| 1 | 11.612211000 | 1.607419000  | -1.479191000 |
| 1 | 10.908749000 | 4.122176000  | 1.943857000  |
| 1 | 7.726506000  | -1.866413000 | -4.378014000 |
| 1 | 11.045382000 | 0.219730000  | -2.616257000 |
| 1 | 2.044424000  | -2.129312000 | -2.457787000 |
| 1 | 5.834530000  | -2.057496000 | -4.503772000 |
| 1 | 3.336978000  | 0.286208000  | 3.042975000  |
| 1 | 1.203959000  | -0.863020000 | 3.422640000  |
| 1 | 1.263118000  | -2.326313000 | -0.645525000 |
| 1 | -1.979282000 | -2.503491000 | 2.995788000  |
| 1 | -1.153195000 | -0.917872000 | 3.033878000  |
| 1 | -0.381896000 | -2.358125000 | 3.778288000  |
| 1 | 0.351014000  | -4.190045000 | 0.534872000  |
| 1 | -1.051185000 | -4.434874000 | 1.625153000  |
| 1 | 0.595800000  | -4.213181000 | 2.307447000  |
| 1 | -0.923663000 | -2.225697000 | -0.569081000 |
| 1 | -1.450658000 | -0.836325000 | 0.431417000  |
| 1 | -2.291702000 | -2.415279000 | 0.566562000  |
| 1 | 1.346520000  | -3.572154000 | -5.649808000 |
| 1 | 1.145458000  | -2.208016000 | -4.514141000 |
| 1 | 1.578675000  | -3.837007000 | -3.896707000 |
| 1 | 3.564433000  | -4.566944000 | -6.155406000 |
| 1 | 3.922925000  | -4.827654000 | -4.414698000 |
| 1 | 5.072098000  | -3.920436000 | -5.444172000 |
| 1 | 2.969689000  | -2.216438000 | -7.015289000 |
| 1 | 4.441113000  | -1.513934000 | -6.272829000 |
| 1 | 2.840509000  | -0.841764000 | -5.866888000 |
| 1 | 10.358372000 | -2.302934000 | -6.727519000 |
| 1 | 8.842443000  | -1.441055000 | -6.329891000 |
| 1 | 9.232073000  | -2.999299000 | -5.527748000 |
| 1 | 12.250638000 | -2.479121000 | -5.068618000 |
| 1 | 11.150052000 | -3.110617000 | -3.796386000 |
| 1 | 12.157920000 | -1.667394000 | -3.474679000 |
| 1 | 11.697202000 | -0.268894000 | -6.273401000 |
| 1 | 11.631862000 | 0.578961000  | -4.700694000 |
| 1 | 10.237985000 | 0.667604000  | -5.813981000 |
| 1 | 12.988793000 | 3.227284000  | -2.164779000 |
| 1 | 13.795179000 | 2.033243000  | -1.093120000 |
| 1 | 14.511074000 | 3.653875000  | -1.332301000 |
| 1 | 13.867716000 | 2.450711000  | 1.467307000  |
| 1 | 13.155923000 | 3.940618000  | 2.157428000  |
| 1 | 14.615962000 | 4.048061000  | 1.129209000  |
| 1 | 11.843752000 | 5.296979000  | -1.170672000 |
| 1 | 13.429441000 | 5.726969000  | -0.442294000 |
| 1 | 11.958839000 | 5.648702000  | 0.577570000  |
| 1 | 10.544248000 | 5.691283000  | 5.147944000  |
| 1 | 10.699078000 | 4.079458000  | 5.921089000  |
| 1 | 10.554252000 | 5.550296000  | 6.928437000  |
| 1 | 8.685356000  | 3.060634000  | 7.196671000  |
| 1 | 7.174168000  | 3.999429000  | 7.386828000  |
| 1 | 8.669974000  | 4.552261000  | 8.197049000  |
| 1 | 8.342212000  | 6.984609000  | 5.292537000  |

|   |              |              |              |
|---|--------------|--------------|--------------|
| 1 | 8.411496000  | 6.850946000  | 7.080944000  |
| 1 | 6.945610000  | 6.327958000  | 6.193253000  |
| 6 | -0.165931000 | 7.695985000  | -3.207868000 |
| 6 | -0.209965000 | 6.995194000  | -1.966999000 |
| 6 | 0.406784000  | 7.582989000  | -0.818831000 |
| 6 | 1.436480000  | 8.547247000  | -1.026051000 |
| 6 | 1.611581000  | 9.151793000  | -2.310000000 |
| 6 | 0.737826000  | 8.795299000  | -3.379229000 |
| 6 | 0.887805000  | 9.409084000  | -4.675302000 |
| 6 | 2.700435000  | 10.071106000 | -2.530383000 |
| 6 | 2.407408000  | 8.769727000  | 0.023182000  |
| 6 | -1.036244000 | 7.287207000  | -4.286843000 |
| 6 | 0.020728000  | 7.286809000  | 0.566212000  |
| 6 | -0.990550000 | 7.980661000  | -5.541255000 |
| 6 | -1.952360000 | 7.664692000  | -6.522977000 |
| 6 | -2.938420000 | 6.674976000  | -6.326635000 |
| 6 | -2.929351000 | 5.964737000  | -5.111796000 |
| 6 | -1.986511000 | 6.226888000  | -4.091352000 |
| 6 | 1.940074000  | 10.362263000 | -4.902595000 |
| 6 | 2.128459000  | 10.858170000 | -6.209195000 |
| 6 | 1.352367000  | 10.430466000 | -7.303449000 |
| 6 | 0.323837000  | 9.502397000  | -7.059188000 |
| 6 | 0.063455000  | 8.986329000  | -5.769877000 |
| 6 | 3.689408000  | 10.274832000 | -1.506192000 |
| 6 | 4.754486000  | 11.163036000 | -1.754926000 |
| 6 | 4.916921000  | 11.816894000 | -2.992534000 |
| 6 | 3.969701000  | 11.560675000 | -4.000584000 |
| 6 | 2.863333000  | 10.701806000 | -3.805524000 |
| 6 | 2.260563000  | 8.112770000  | 1.290456000  |
| 6 | 3.374126000  | 8.025742000  | 2.145993000  |
| 6 | 4.619919000  | 8.602282000  | 1.807188000  |
| 6 | 4.689962000  | 9.384103000  | 0.639113000  |
| 6 | 3.599539000  | 9.505352000  | -0.254681000 |
| 6 | -1.274957000 | 6.822665000  | 0.908078000  |
| 6 | -1.654147000 | 6.633126000  | 2.238263000  |
| 6 | -0.761120000 | 6.904373000  | 3.307631000  |
| 6 | 0.528628000  | 7.356423000  | 2.971085000  |
| 6 | 0.939473000  | 7.561809000  | 1.629335000  |
| 6 | -3.968867000 | 6.397614000  | -7.445774000 |
| 6 | -1.218723000 | 6.841254000  | 4.784336000  |
| 6 | 5.862238000  | 8.286610000  | 2.667285000  |
| 6 | 6.096808000  | 12.795133000 | -3.198798000 |
| 6 | 1.694777000  | 10.940982000 | -8.721890000 |
| 6 | -2.556221000 | 6.077139000  | 4.945564000  |
| 6 | -1.410876000 | 8.302830000  | 5.284762000  |
| 6 | -0.162102000 | 6.138644000  | 5.675679000  |
| 6 | 5.576268000  | 8.620824000  | 4.156552000  |
| 6 | 7.108346000  | 9.084698000  | 2.216926000  |
| 6 | 6.170409000  | 6.768738000  | 2.515410000  |
| 6 | 7.428281000  | 12.141946000 | -2.736838000 |
| 6 | 5.824210000  | 14.070179000 | -2.351306000 |
| 6 | 6.258962000  | 13.205279000 | -4.682450000 |
| 6 | 3.132413000  | 10.471942000 | -9.086139000 |
| 6 | 1.628607000  | 12.493093000 | -8.745607000 |
| 6 | 0.720320000  | 10.394303000 | -9.791657000 |
| 6 | -3.217331000 | 5.979115000  | -8.741064000 |
| 6 | -4.789090000 | 7.690369000  | -7.715146000 |
| 6 | -4.953918000 | 5.265929000  | -7.069491000 |
| 1 | -1.945342000 | 8.220784000  | -7.466810000 |
| 1 | -3.663509000 | 5.170557000  | -4.952711000 |

|   |              |              |               |
|---|--------------|--------------|---------------|
| 1 | 2.942933000  | 11.565540000 | -6.393959000  |
| 1 | -0.272148000 | 9.136176000  | -7.898612000  |
| 1 | 5.484131000  | 11.344492000 | -0.958587000  |
| 1 | 4.102255000  | 12.031184000 | -4.976812000  |
| 1 | 3.283142000  | 7.433597000  | 3.064767000   |
| 1 | 5.637719000  | 9.857201000  | 0.369810000   |
| 1 | -2.007894000 | 6.640475000  | 0.114837000   |
| 1 | -2.674342000 | 6.291036000  | 2.443898000   |
| 1 | 1.233442000  | 7.619284000  | 3.769628000   |
| 1 | -3.394457000 | 6.597221000  | 4.443139000   |
| 1 | -2.815818000 | 6.000021000  | 6.020078000   |
| 1 | -2.489974000 | 5.050194000  | 4.535340000   |
| 1 | -2.159061000 | 8.835599000  | 4.665137000   |
| 1 | -0.461866000 | 8.871542000  | 5.231199000   |
| 1 | -1.761149000 | 8.312308000  | 6.337527000   |
| 1 | -0.043991000 | 5.077461000  | 5.385782000   |
| 1 | -0.481999000 | 6.163698000  | 6.736643000   |
| 1 | 0.829725000  | 6.625863000  | 5.617970000   |
| 1 | 4.747568000  | 8.010314000  | 4.564386000   |
| 1 | 5.304797000  | 9.688650000  | 4.278311000   |
| 1 | 6.471090000  | 8.418376000  | 4.775772000   |
| 1 | 7.402211000  | 8.837670000  | 1.178019000   |
| 1 | 7.967425000  | 8.833859000  | 2.870160000   |
| 1 | 6.944129000  | 10.179019000 | 2.280955000   |
| 1 | 6.362669000  | 6.513948000  | 1.455549000   |
| 1 | 5.325091000  | 6.144448000  | 2.858636000   |
| 1 | 7.062974000  | 6.481759000  | 3.103969000   |
| 1 | 8.268877000  | 12.852010000 | -2.872332000  |
| 1 | 7.645855000  | 11.231076000 | -3.326024000  |
| 1 | 7.405814000  | 11.855278000 | -1.668205000  |
| 1 | 4.881436000  | 14.559029000 | -2.667887000  |
| 1 | 6.650871000  | 14.801022000 | -2.467111000  |
| 1 | 5.732009000  | 13.825022000 | -1.275036000  |
| 1 | 5.378767000  | 13.761943000 | -5.059543000  |
| 1 | 6.414914000  | 12.320767000 | -5.331395000  |
| 1 | 7.140220000  | 13.866925000 | -4.794789000  |
| 1 | 3.411283000  | 10.824037000 | -10.100292000 |
| 1 | 3.200195000  | 9.367030000  | -9.071216000  |
| 1 | 3.885870000  | 10.859966000 | -8.373752000  |
| 1 | 1.878896000  | 12.875033000 | -9.756222000  |
| 1 | 2.341308000  | 12.946756000 | -8.029983000  |
| 1 | 0.612519000  | 12.849264000 | -8.482717000  |
| 1 | 0.994180000  | 10.794182000 | -10.787800000 |
| 1 | -0.326373000 | 10.693924000 | -9.585896000  |
| 1 | 0.758380000  | 9.289058000  | -9.855429000  |
| 1 | -2.615895000 | 5.064457000  | -8.568585000  |
| 1 | -2.530550000 | 6.773143000  | -9.092337000  |
| 1 | -3.938507000 | 5.771559000  | -9.557776000  |
| 1 | -5.537674000 | 7.515893000  | -8.514932000  |
| 1 | -4.141491000 | 8.528726000  | -8.037352000  |
| 1 | -5.327916000 | 8.012207000  | -6.801788000  |
| 1 | -4.429342000 | 4.307185000  | -6.887903000  |
| 1 | -5.671306000 | 5.101827000  | -7.897745000  |
| 1 | -5.541745000 | 5.514580000  | -6.163902000  |
| 6 | 9.194887000  | 3.983369000  | -2.694844000  |
| 6 | 7.987575000  | 3.504178000  | -2.026761000  |
| 6 | 9.519215000  | 5.355145000  | -2.663037000  |
| 6 | 7.158491000  | 4.391663000  | -1.324673000  |
| 6 | 5.708170000  | 4.253486000  | -1.420575000  |
| 6 | 5.105188000  | 3.172667000  | -2.148989000  |

|   |              |             |              |
|---|--------------|-------------|--------------|
| 6 | 3.783007000  | 3.394603000 | -2.654003000 |
| 6 | 10.126373000 | 5.277066000 | -5.080032000 |
| 6 | 9.783915000  | 3.855575000 | -5.107434000 |
| 6 | 9.991376000  | 6.016864000 | -3.883079000 |
| 6 | 9.324783000  | 3.224344000 | -3.940157000 |
| 6 | 8.217957000  | 2.279394000 | -4.023321000 |
| 6 | 7.643939000  | 1.889040000 | -5.274767000 |
| 6 | 6.295000000  | 1.406475000 | -5.233174000 |
| 6 | 5.979246000  | 2.244062000 | -2.888595000 |
| 6 | 7.391697000  | 2.459779000 | -2.849759000 |
| 6 | 5.471789000  | 1.579678000 | -4.049964000 |
| 6 | 8.994036000  | 7.911066000 | -5.150363000 |
| 6 | 9.124254000  | 7.138157000 | -6.383281000 |
| 6 | 9.414607000  | 7.361221000 | -3.919231000 |
| 6 | 9.678139000  | 5.846978000 | -6.348586000 |
| 6 | 9.083620000  | 4.784048000 | -7.153390000 |
| 6 | 7.996387000  | 5.041503000 | -8.052640000 |
| 6 | 7.153797000  | 3.926265000 | -8.370598000 |
| 6 | 8.126101000  | 2.553967000 | -6.504998000 |
| 6 | 9.148730000  | 3.553487000 | -6.387767000 |
| 6 | 7.217960000  | 2.694425000 | -7.605448000 |
| 6 | 7.369732000  | 8.243198000 | -2.806415000 |
| 6 | 6.934470000  | 8.798529000 | -4.089488000 |
| 6 | 8.585194000  | 7.530904000 | -2.721546000 |
| 6 | 7.730589000  | 8.642447000 | -5.235804000 |
| 6 | 7.101822000  | 8.335651000 | -6.517112000 |
| 6 | 5.675626000  | 8.279485000 | -6.659105000 |
| 6 | 5.170636000  | 7.476432000 | -7.734546000 |
| 6 | 7.414315000  | 6.401813000 | -8.089483000 |
| 6 | 7.961985000  | 7.405339000 | -7.224835000 |
| 6 | 6.031470000  | 6.547095000 | -8.441644000 |
| 6 | 7.494152000  | 5.815126000 | -1.283444000 |
| 6 | 6.234304000  | 6.551873000 | -1.380556000 |
| 6 | 8.649627000  | 6.291536000 | -1.943399000 |
| 6 | 6.175353000  | 7.738063000 | -2.131996000 |
| 6 | 5.022364000  | 7.996336000 | -2.986205000 |
| 6 | 3.904581000  | 7.104269000 | -3.019293000 |
| 6 | 3.107713000  | 7.129056000 | -4.205434000 |
| 6 | 4.841767000  | 8.441480000 | -5.450297000 |
| 6 | 5.487940000  | 8.655970000 | -4.190731000 |
| 6 | 3.565292000  | 7.795025000 | -5.407040000 |
| 6 | 3.959093000  | 5.862568000 | -2.226686000 |
| 6 | 5.137917000  | 5.588039000 | -1.458794000 |
| 6 | 3.218069000  | 4.729098000 | -2.695599000 |
| 6 | 2.219159000  | 5.953710000 | -6.058908000 |
| 6 | 2.278202000  | 5.998155000 | -4.599063000 |
| 6 | 2.334041000  | 4.810436000 | -3.854689000 |
| 6 | 2.243889000  | 4.709539000 | -6.724279000 |
| 6 | 3.847976000  | 5.622303000 | -8.397563000 |
| 6 | 3.825022000  | 6.907894000 | -7.700588000 |
| 6 | 3.030896000  | 7.068041000 | -6.553279000 |
| 6 | 3.076320000  | 4.540313000 | -7.919114000 |
| 6 | 4.977408000  | 2.986100000 | -8.325788000 |
| 6 | 5.774720000  | 4.110450000 | -8.810509000 |
| 6 | 5.221511000  | 5.401984000 | -8.844650000 |
| 6 | 3.653150000  | 3.195473000 | -7.881968000 |
| 6 | 4.048488000  | 1.687236000 | -5.941609000 |
| 6 | 5.423240000  | 1.483090000 | -6.400019000 |
| 6 | 5.877687000  | 2.117614000 | -7.568867000 |
| 6 | 3.178525000  | 2.531661000 | -6.664599000 |

|   |             |             |              |
|---|-------------|-------------|--------------|
| 6 | 2.345556000 | 3.518824000 | -4.537936000 |
| 6 | 3.255790000 | 2.648116000 | -3.792725000 |
| 6 | 4.089811000 | 1.751637000 | -4.481463000 |
| 6 | 2.307048000 | 3.466741000 | -5.948765000 |

## 5. References

- 1 A. D. Becke, Phys. Rev. A 1988, **38**, 3098-3100.
- 2 C. Lee, W. Yang and R. G. Parr, Phys. Rev. B 1988, **37**, 785-789.
- 3 F. Weigend and R. Ahlrichs, Phys. Chem. Chem. Phys. 2005, **7**, 3297-3305.
- 4 F. Weigend, Phys. Chem. Chem. Phys. 2006, **8**, 1057-1065.
- 5 S. Grimme, J. Antony, S. Ehrlich and H. Krieg, J. Chem. Phys. 2010, **132**, 154104.
- 6 S. Grimme, S. Ehrlich and L. Goerigk, J. Comput. Chem. 2011, **32**, 1456-1465.  
K. Eichkorn, F. Weigend, O. Treutler, R. Ahlrichs; Theor. Chem. Acc. 1997, **97**, 119.
- 7 K. Eichkorn, F. Weigend, O. Treutler, R. Ahlrichs; Theor. Chem. Acc. 1997, **97**, 119.
- 8 K. Morokuma, J. Chem. Phys. 1971, **55**, 1236-1244.
- 9 F. M. Bickelhaupt, E. J. Baerends, in *Reviews in Computational Chemistry*, vol. 15 (Eds.: K.B. Lipkowitz, D.B. Boyd), John Wiley & Sons, Inc., 2000, pp. 1-86.
- 10 ADF 2018, SCM, Theoretical Chemistry, Vrije Universiteit, Amsterdam, The Netherlands, E.J. Baerends, T. Ziegler, A.J. Atkins, J. Autschbach, O. Baseggio, D. Bashford, A. Bérces, F.M. Bickelhaupt, C. Bo, P.M. Boerrigter, L. Cavallo, C. Daul, D.P. Chong, D.V. Chulhai, L. Deng, R.M. Dickson, J.M. Dieterich, D.E. Ellis, M. van Faassen, L. Fan, T.H. Fischer, A. Förster, C. Fonseca Guerra, M. Franchini, A. Ghysels, A. Giammona, S.J.A. van Gisbergen, A. Goetz, A.W. Götz, J.A. Groeneveld, O.V. Gritsenko, M. Grüning, S. Gusarov, F.E. Harris, P. van den Hoek, Z. Hu, C.R. Jacob, H. Jacobsen, L. Jensen, L. Joubert, J.W. Kaminski, G. van Kessel, C. König, F. Kootstra, A. Kovalenko, M.V. Krykunov, E. van Lenthe, D.A. McCormack, A. Michalak, M. Mitoraj, S.M. Morton, J. Neugebauer, V.P. Nicu, L. Noodleman, V.P. Osinga, S. Patchkovskii, M. Pavanello, C.A. Peeples, P.H.T. Philipsen, D. Post, C.C. Pye, H. Ramanantoanina, P. Ramos, W. Ravenek, J.I. Rodríguez, P. Ros, R. Rüger, P.R.T. Schipper, D. Schlüns, H. van Schoot, G. Schreckenbach, J.S. Seldenthuis, M. Seth, J.G. Snijders, M. Solà, M. Stener, M. Swart, D. Swerhone, V. Tognetti, G. te Velde, P. Vernooijs, L. Versluis, L. Visscher, O. Visser, F. Wang, T.A. Wesolowski, E.M. van Wezenbeek, G. Wiesenekker, S.K. Wolff, T.K. Woo, A.L. Yakovlev
- 11 G. A. Zhurko, Chemcraft 1.80 (build 523b) - graphical program for visualization of quantum chemistry computations. (<https://chemcraftprog.com>).
- 12 T. Ziegler and A. Rauk, Theor. Chim. Acta 1977, **46**, 1-10.
- 13 T. Ziegler and A. Rauk, Inorg. Chem. 1979, **18**, 1558-1565.
- 14 T. Ziegler and A. Rauk, Inorg. Chem. 1979, **18**, 1755-1759.
- 15 S. Grimme, J. Comput. Chem. 2004, **25**, 1463-1473.
- 16 S. Grimme, J. Comput. Chem. 2006, **27**, 1787-1799.
- 17 E. Johnson, S. Keinan, P. Mori-Sánchez, J. Contreras-García, A. Cohen and W. Yang, J. Am. Chem. Soc. 2010, **132**, 6498-6506.
- 18 J. Contreras-García, E. Johnson, S. Keinan, R. Chaudret, J. Piquemal, D. Beratan and W. Yang, J. Chem. Theory Comput. 2011, **7**, 625-632.
- 19 J. Contreras-García, W. Yang and E. Johnson, J. Phys. Chem. A, 2011, **115**, 12983-12990.
- 20 T. Lu and F. Chen, J. Comput. Chem. 2012, **33**, 580-592.
